# Supplementary material
Source: PubMed Central journal article supplement (PMC6511021)
Supplement: pnas.1901313116.sapp.pdf [file pnas.1901313116.sapp.pdf]

Supplementary Information for

**Partial inhibition of the overactivated Ku80-dependent DNA repair pathway rescues neurodegeneration in *C9ORF72*-ALS/FTD**

Rodrigo Lopez-Gonzalez<sup>a,1</sup>, Dejun Yang<sup>a,1</sup>, Mochtar Pribadi<sup>b</sup>, Tanya S. Kim<sup>b</sup>, Gopinath Krishnan<sup>a</sup>, So Yoen Choi<sup>a</sup>, Soojin Lee<sup>a</sup>, Giovanni Coppola<sup>b</sup>, and Fen-Biao Gao<sup>a,2</sup>

<sup>a</sup>Department of Neurology, University of Massachusetts Medical School, Worcester, MA 01605; and <sup>b</sup>Semel Institute for Neuroscience and Human Behavior, David Geffen School of Medicine, University of California, Los Angeles, CA 90095.

<sup>1</sup>These authors contributed equally to this work.

<sup>2</sup>To whom correspondence should be addressed: Fen-Biao Gao

Email: [fen-biao.gao@umassmed.edu](mailto:fen-biao.gao@umassmed.edu)

**This PDF file includes:**

Supplementary text

Figs. S1 to S11

Tables S1 to S4

**Other supplementary materials for this manuscript include the following:**

## Materials and methods

**Motor Neuron Differentiation from iPSC Lines.** Motor neurons were differentiated as described (Lopez-Gonzalez et al. 2016). Briefly, iPSCs were plated and expanded in mTSER1 medium (Stem Cell Technologies) in Matrigel-coated wells. Twenty-four hours after plating, the culture medium was replaced with neuroepithelial progenitor (NEP) medium, DMEM/F12, neurobasal medium at 1:1, 0.5X N2, 0.5X B27, 0.1 mM ascorbic acid (Sigma), 1X Glutamax (Invitrogen), 3  $\mu$ M CHIR99021 (Tocris Bioscience), 2  $\mu$ M DMH1 (Tocris Bioscience), and 2  $\mu$ M SB431542 (Stemgent). After 6 days, NEPs were dissociated with accutase, split 1:6 into Matrigel-coated wells, and cultured for 6 days in motor neuron progenitor induction medium (NEP with 0.1  $\mu$ M retinoic acid and 0.5  $\mu$ M purmorphamine, both from Stemgent). Motor neuron progenitors were dissociated with accutase to generate suspension cultures. After 6 days, the cultures were dissociated into single cells, plated on laminin-coated plates/coverlips in motor neuron differentiation medium containing 0.5  $\mu$ M retinoic acid, 0.1  $\mu$ M purmorphamine, and 0.1  $\mu$ M Compound E (Calbiochem) for 2 weeks and then in the same medium without Compound E for up to 4 months.

**Western Blot Analysis.** Fly heads were collected and homogenized with 2X Laemli sample buffer (BioRad), and lysates from five fly heads were analyzed by SDS-PAGE. Motor neuron cultures were lysed with RIPA buffer (Thermo Scientific), and 20  $\mu$ g of protein was separated by SDS-PAGE. Fly and motor neuron samples were immunoblotted with antibodies listed in *SI Appendix*, Table S6. After incubation, the membranes were washed with PBST and incubated with IRDye anti-rabbit or anti-mouse secondary antibodies (1:5000, LI-COR Biosciences).

**Immunostaining.** High-yield human motor neuron cultures from controls and *C9ORF72* carriers were fixed in 4% paraformaldehyde for 15 min and permeabilized with 0.3% Triton X-100 for 5 min. The cells were blocked with 5% bovine serum albumin for 30 min and incubated with the following primary antibodies overnight at 4°C: goat anti-ChAT (1:200, Millipore, Cat. no. AB144P), rabbit anti-phosphorylated ATM (1:1000, Abcam, Cat. no. ab81292), rabbit anti Ku80 (1:500, Cell Signaling, Cat. no. 2753), and cleaved caspase 3 (1:200, Cell Signaling, Cat. no. 9661).

**Comet Assay.** A comet assay was done as described (Lopez-Gonzalez et al., 2016). Briefly, iPSCs derived neurons from *C9ORF72* line 26L6 and *Ku80* heterozygous lines 26L6-34E and 26L6-64A were dissociated to obtain single-cell suspensions. These cells were mixed with 1% low-gelling agarose solution and placed on glass slides and allowed to gel. These slides were gently submerged in lysis solution and left overnight at 4 °C. Slides were transferred to an electrophoresis solution, run at 0.6 V/cm for 25 min, removed, and submerged in rinse buffer for 30 min at room temperature. The slides were then incubated with 2.5 µg/ml SYBR Safe (Invitrogen) for 20 min and washed with distilled water. For each experimental condition, 100 cells were analyzed with Image J software and scored according to tail length and the percentage of DNA in the tail.

**Genetic Analysis of iPSCs Lines.** In order to analyze chromosome abnormalities, we performed genetic analysis using the kit from Stem Cell Technologies, which examines 8 most common karyotype abnormalities found in human embryonic stem cells and iPSCs. qPCR-based analysis was performed to examine the following chromosomes: 1q, 4p, 8q,

10p, 12p, 17q, 18q, 20q and Xp. In order to do the test, genomic DNA was extracted from control and *C9ORF72* iPSC lines as well as all the CRISPR-Cas9 lines used in this study. The qPCR was performed following manufacturer's instructions using 10 ng of genomic DNA per sample.

**Short Tandem Repeat (STR) Analysis in iPSCs.** Short tandem repeat analysis was performed using The PowerPlex® Fusion 6C System (Promega). Parental *C9ORF72* iPSC lines 26L6 and 27L11 as well as CRISPR-Cas9 modified lines 26L6-34E, 26L664A, 26Z90 and 27M91 were cultured and then genomic DNA was isolated to performed end point PCR following manufacturer's instructions. 1 ng of genomic DNA was amplified. Amplification products were then mixed with WEN Internal Lane Standard 500 and analyzed using an Applied Biosystems® 3500xL Genetic Analyzer and data analyzed with peak scanner software version 2 (Applied biosystems).

**RNA Extraction and Quantitative Real-time PCR.** Total RNA from fly brains or iPSC-derived neurons was extracted with the RNeasy Mini Kit (Qiagen) and reverse transcribed to cDNA with the TaqMan Reverse Transcription Kit (Applied Biosystems). Quantitative PCR was done with SYBR Green Master Mix (Applied Biosystems) Using primers listed in *SI Appendix*, Table S3. Ct values for each gene were normalized to GAPDH. Relative mRNA expression was calculated with the double delta Ct method.

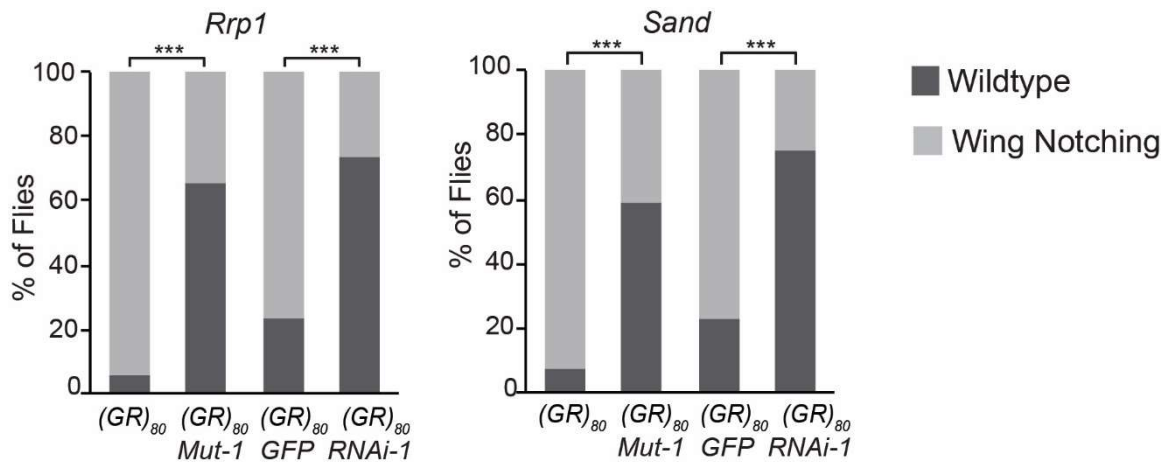

**Fig. S1.** Quantification of the effects of some suppressor genes on poly(GR)-induced loss of non-neuronal cells.  $(GR)_{80}$ -expressing flies with or without non-neuronal cell death were counted. For,  $w^{1118}$  or *UAS-GFP* flies crossed to *Vg-Gal4/CyO*; *UAS-(GR)<sub>80</sub>/TM6,Tb* flies served as negative controls for genetic alleles or *UAS-RNAi* lines of each modifier gene, respectively. The *Drosophila* lines for modifier genes are described in Table S2. \*\*\* $P < 0.001$  by chi-square analysis. 80-130 flies were analyzed for each genotype.

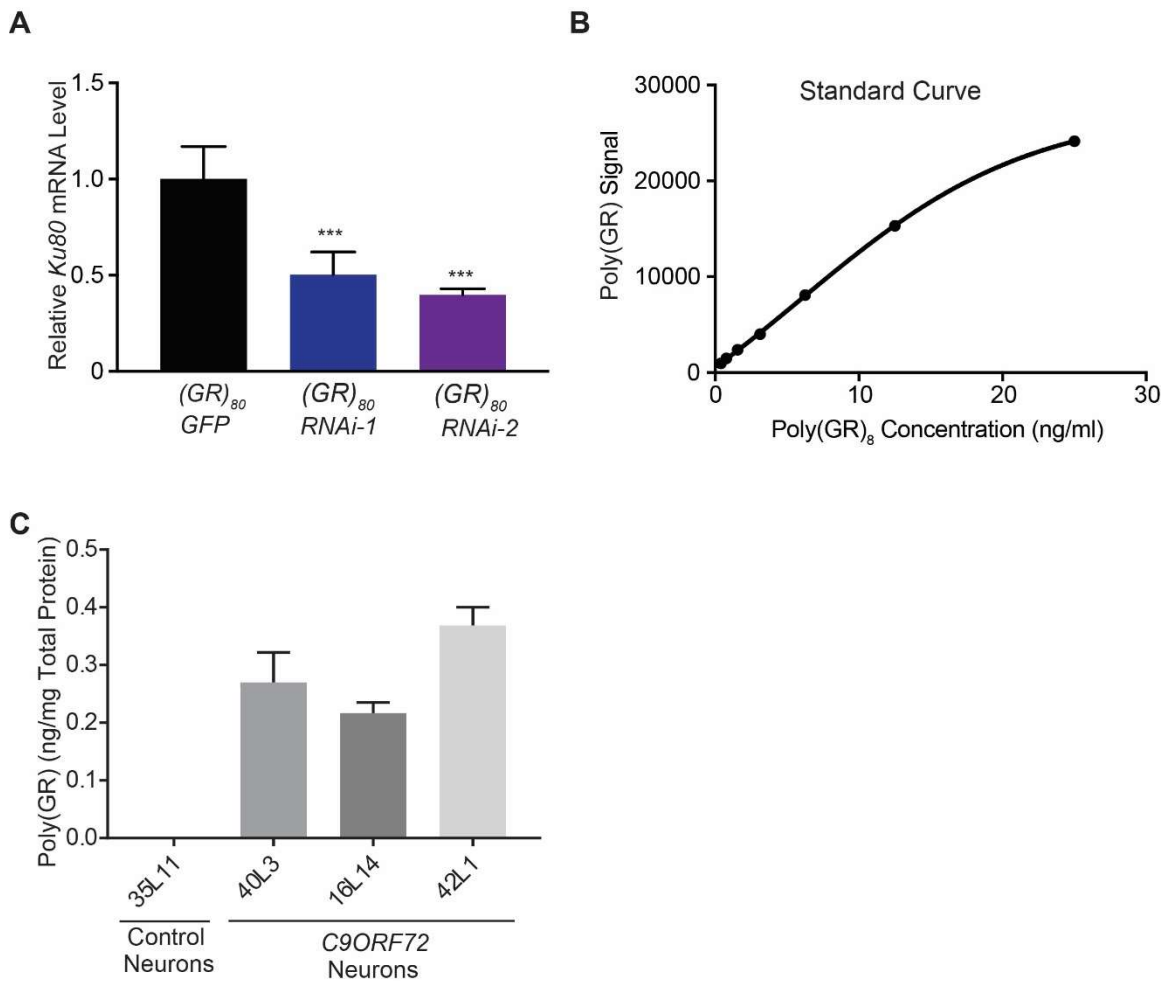

**Fig. S2.** Efficiency of *Ku80* RNAi in the fly eye and poly(GR) accumulation in *C9ORF72* iPSC-derived motor neurons. (A) The relative *Ku80* mRNA levels before and after RNAi knockdown in the fly eye. RNAi expression was driven by GMR-Gal4. Thus, the actual knockdown efficiency in photoreceptor neurons might be higher. Values are mean  $\pm$  S.D. of 3 independent experiments. \*\*\* $P < 0.001$  by one-way ANOVA. (B) Standard curve for poly(GR) ELISA measurement. (C) The expression level of Poly(GR) in 3 *C9ORF72* iPSC lines-derived motor neuron cultures. These cultures were of 2-month old and derived from two independent differentiations.

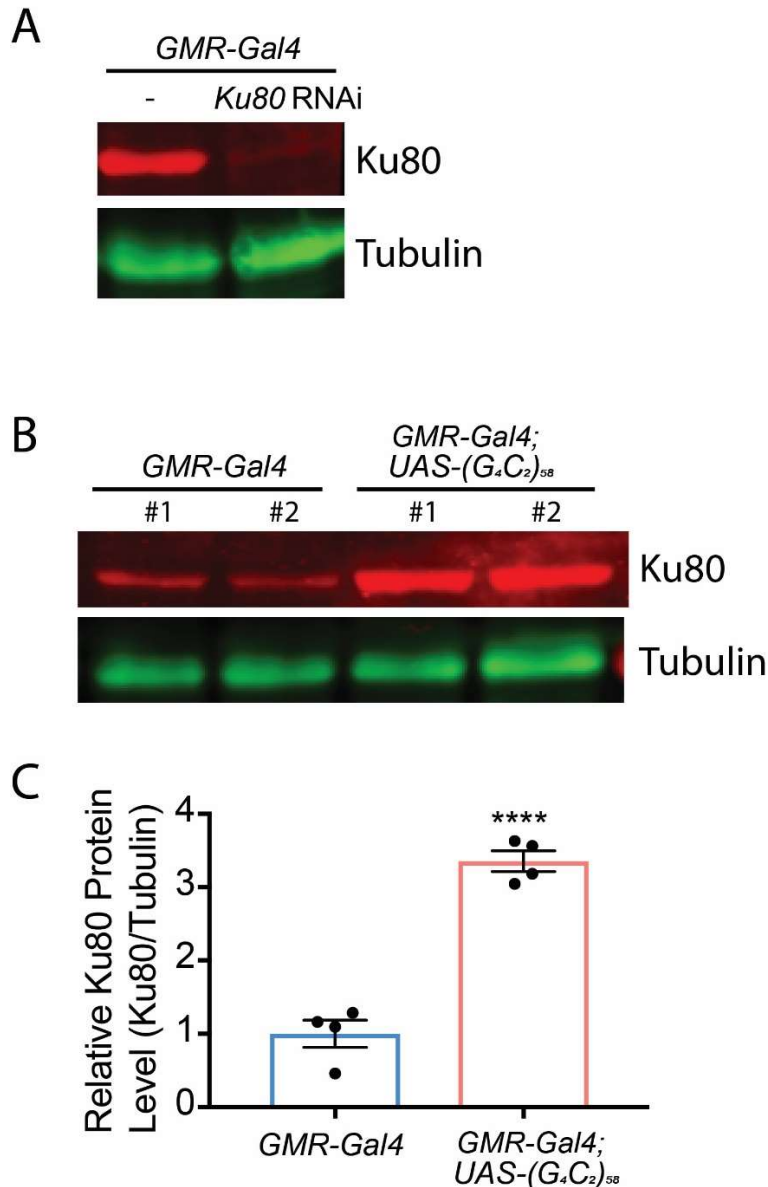

**Fig. S3.** The level of Ku80 protein is also increased in  $(G_4C_2)_{58}$  flies. (A) Western blot analysis of Ku80 protein levels in control ( $GMR-Gal4/+$ ) and  $Ku80$  knockdown flies ( $GMR-Gal4/+; UAS-Ku80 RNAi$ ) demonstrates the specificity of the Ku80 antibody. (B) A representative image of western blot analysis of Ku80 protein levels in control ( $GMR-Gal4/GMR-Gal4$ ) and  $(G_4C_2)_{58}$ -expressing flies ( $GMR-Gal4/GMR-Gal4; UAS-(G_4C_2)_{58}/+$ ). (C) Relative Ku80 protein levels for the indicated fly lines.  $n=4$  independent experiments. All values are mean  $\pm$  SEM. \*\*\*\* $P<0.0001$  by Student's t test.

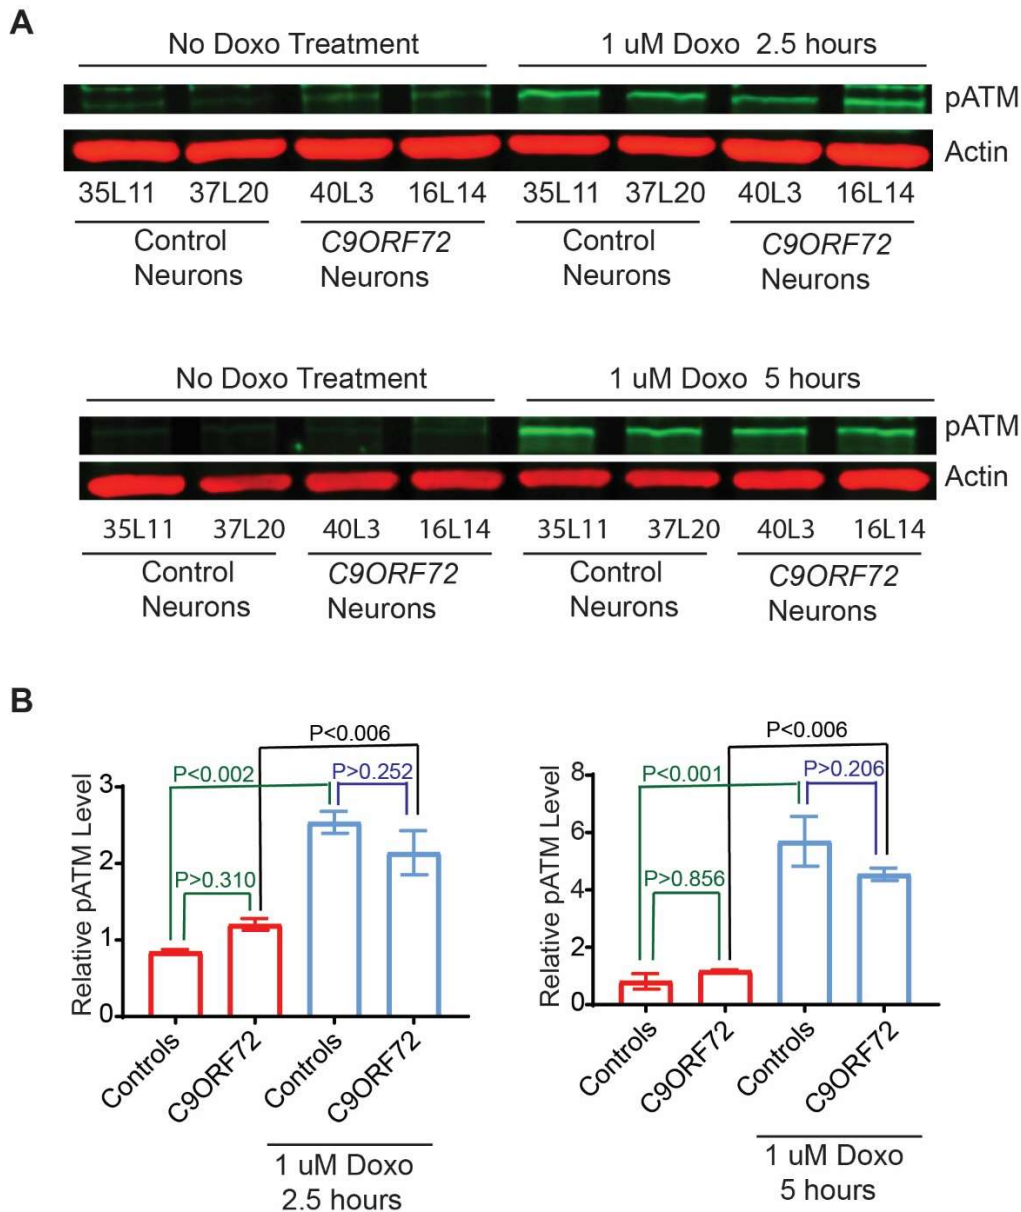

**Fig. S4.** DNA damage increased pATM levels in both control and *C9ORF72* iPSC-derived motor neurons. (A) Western blot analysis of 1-month-old neurons derived from two control and two *C9ORF72* iPSC lines. Neurons were treated with doxorubicin (1  $\mu$ M) or left untreated. (B) Quantification of western blots shows a significant increase in pATM levels after 2.5 h and 5 h of doxorubicin treatment. Values are mean  $\pm$  SEM of one differentiation of two control and two *C9ORF72* iPSC lines. *P* values were determined by one-way ANOVA and Tukey's test.



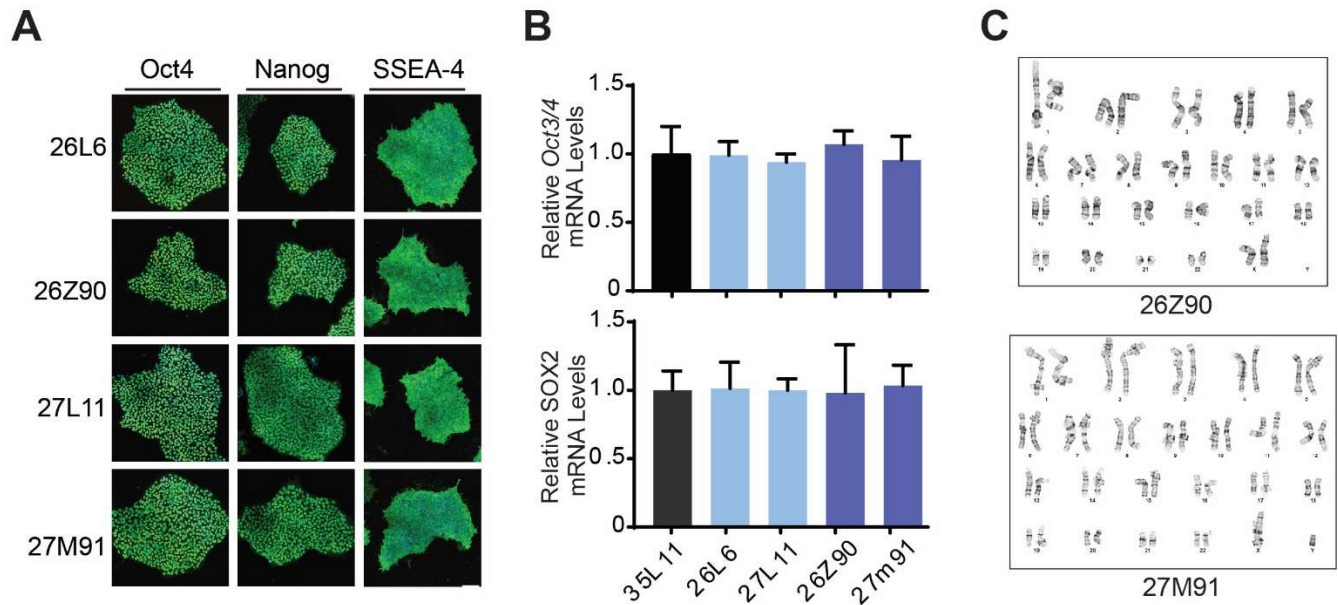

**Fig. S5.** Characterization of isogenic iPSC lines 26Z90 and 27M91 after CRISPR-Cas9 deletion of expanded G<sub>4</sub>C<sub>2</sub> repeats from parental *C9ORF72* iPSC lines 26L6 and 27L11. (A) Expression of the pluripotency markers Oct-4, Nanog and SSEA-4 in iPSCs of different lines. Scale bar, 100  $\mu$ m. (B) Quantitative RT-PCR analysis of expression levels of pluripotent stem cell markers SOX2 and Oct3/4. Values are mean  $\pm$  SEM of 2 independent iPSC cultures shows no significant difference between different lines in the mRNA levels of *Oct3/4* ( $P=0.9990$ ) and *SOX2* ( $P=0.9621$ ). These  $P$  values were determined by one-way ANOVA. (C) Karyotype analysis of iPSC lines 26Z90 and 27M91 shows no chromosomal abnormalities.

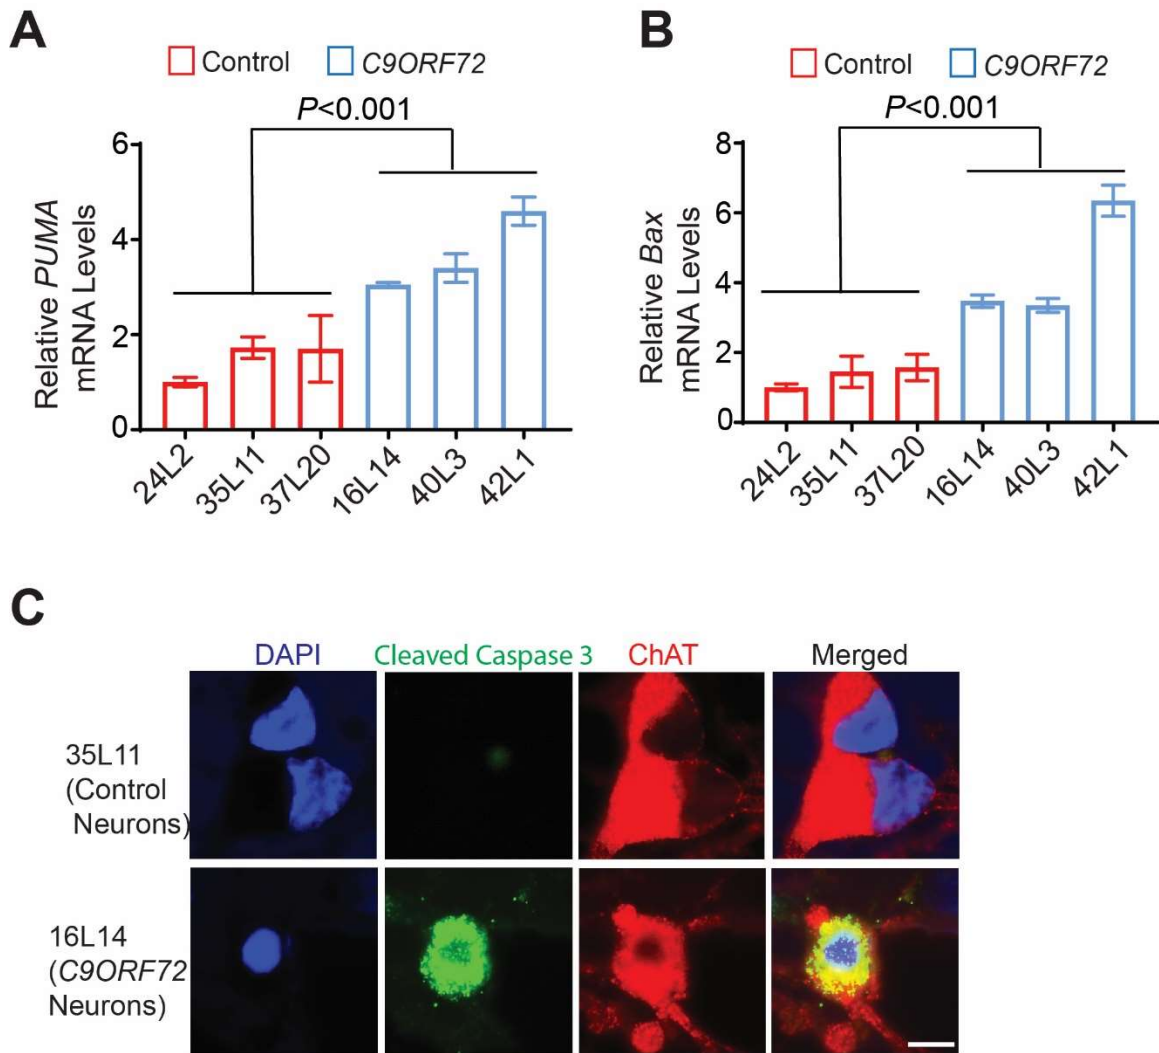

**Fig. S6.** Some apoptotic markers are upregulated in iPSC-derived motor neurons from *C9ORF72* carriers. (A) qPCR analysis of relative levels of PUMA mRNA. (B) qPCR analysis of relative mRNA levels of Bax. Values are mean  $\pm$  SEM of neurons from two independent differentiations. Two-tailed Student's t test was used to compare 3 control subjects and 3 *C9ORF72* patients. Scale bar, 20  $\mu$ m. (C) Cleaved caspase-3 and ChAT Immunostaining in iPSC-derived motor neurons. Scale bar, 10  $\mu$ m.

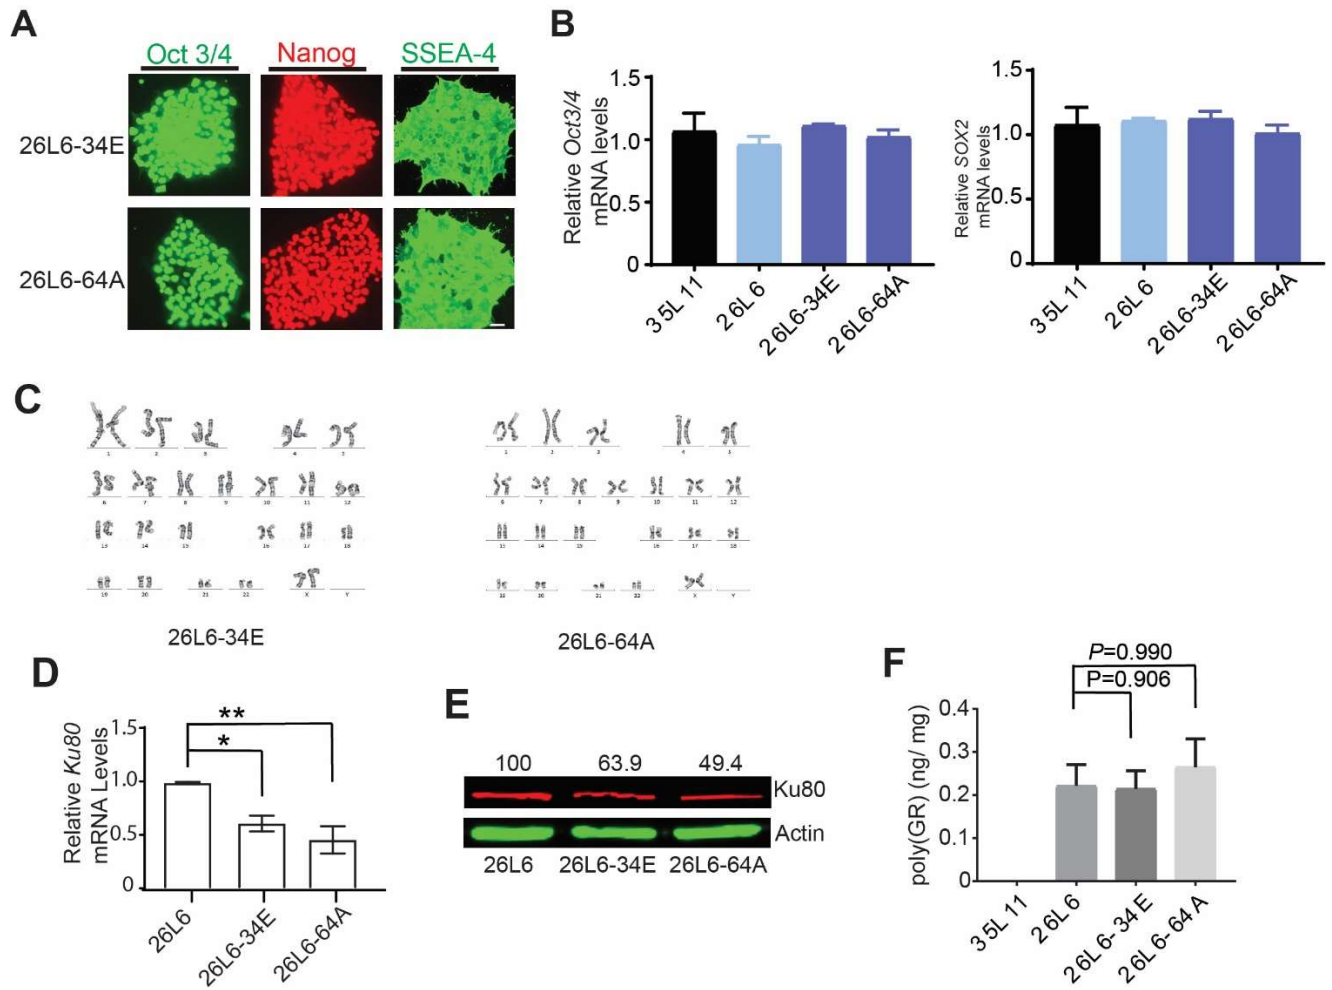

**Fig. S7.** Characterization of *Ku80* heterozygous knockout iPSC lines generated by CRISPR-Cas9 technology. (A) Immunostaining analysis of stem cell marker expression in heterozygous *Ku80* knockout lines. Scale bar 10  $\mu$ m. (B) Genetic deletion of one copy of *Ku80* does not affect the expression levels of some stem cell marker mRNAs. Values are mean  $\pm$  SEM of 2 independent iPSC cultures. There is no significant difference between different lines in the mRNA levels of *Oct3/4* ( $P=0.7358$ ) and *SOX2* ( $P=0.6592$ ). These  $P$  values were determined by one-way ANOVA. (C) Karyotype analysis of the two heterozygous *Ku80* knockout lines. (D) *Ku80* mRNA expression levels in *C9ORF72* iPSC lines. Values are mean  $\pm$  SEM from two independent iPSC cultures. \* $P<0.05$ , \*\* $P<0.01$  by one-way ANOVA and Tukey's test. (E) *Ku80* western blot analysis of iPSCs from the *C9ORF72* carrier line 26L6 and heterozygous *Ku80* knockout lines. (F) ELISA analysis of poly(GR) levels in 2-month-old motor neurons derived from three independent differentiations. Values are mean  $\pm$  SEM from three independent differentiations analyzed by one-way ANOVA and Tukey's test.

**A**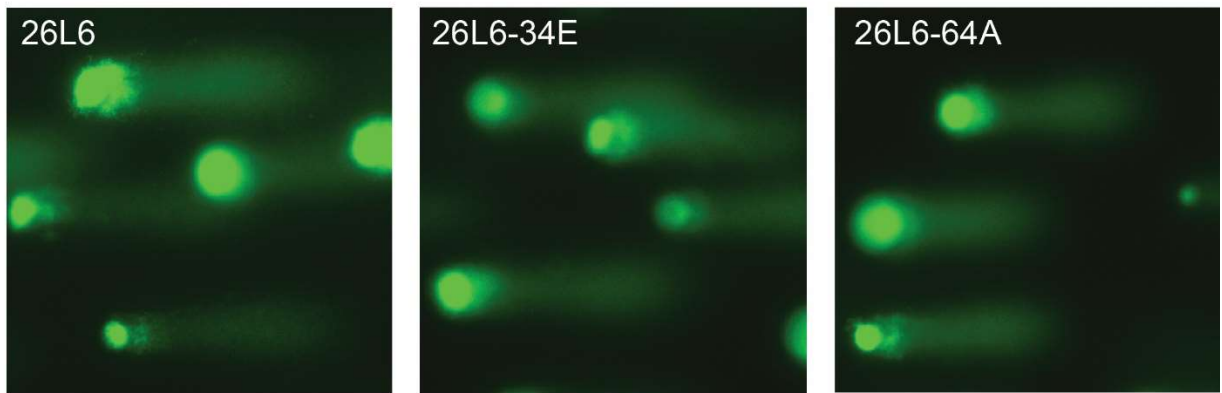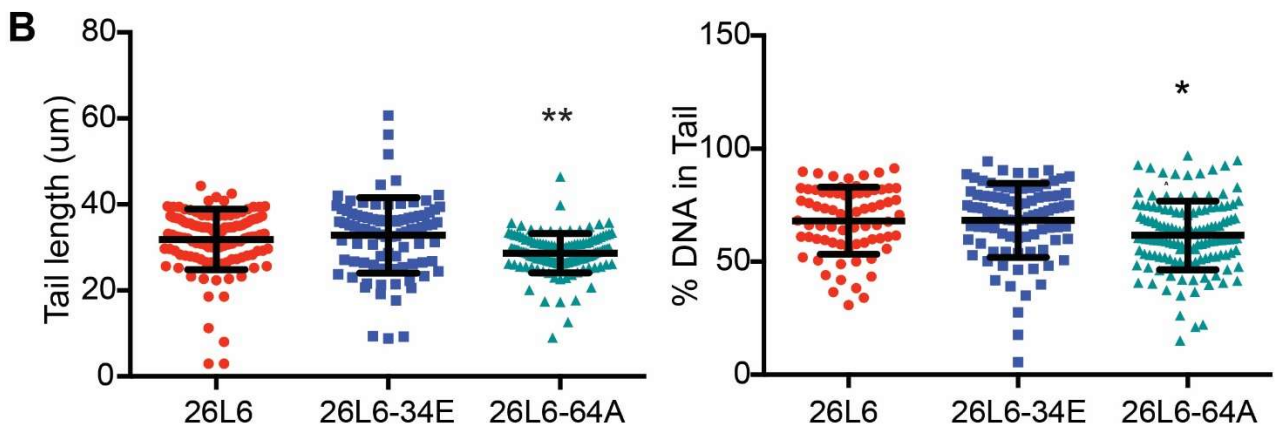

**Fig. S8.** Comet assay analysis. (A) Representative images of comet assay analysis of motor neurons differentiated from *C9ORF72* iPSC line 26L6 and its isogenic *Ku80* heterozygous knockout lines 26L6-34E and 26L6-64A. (B) Quantification of comet length tail and percentage of DNA in the tail in 2-month-old motor neurons from two independent differentiations. \* $P < 0.05$ . \*\* $P < 0.01$  by one-way ANOVA and Tukey's test.

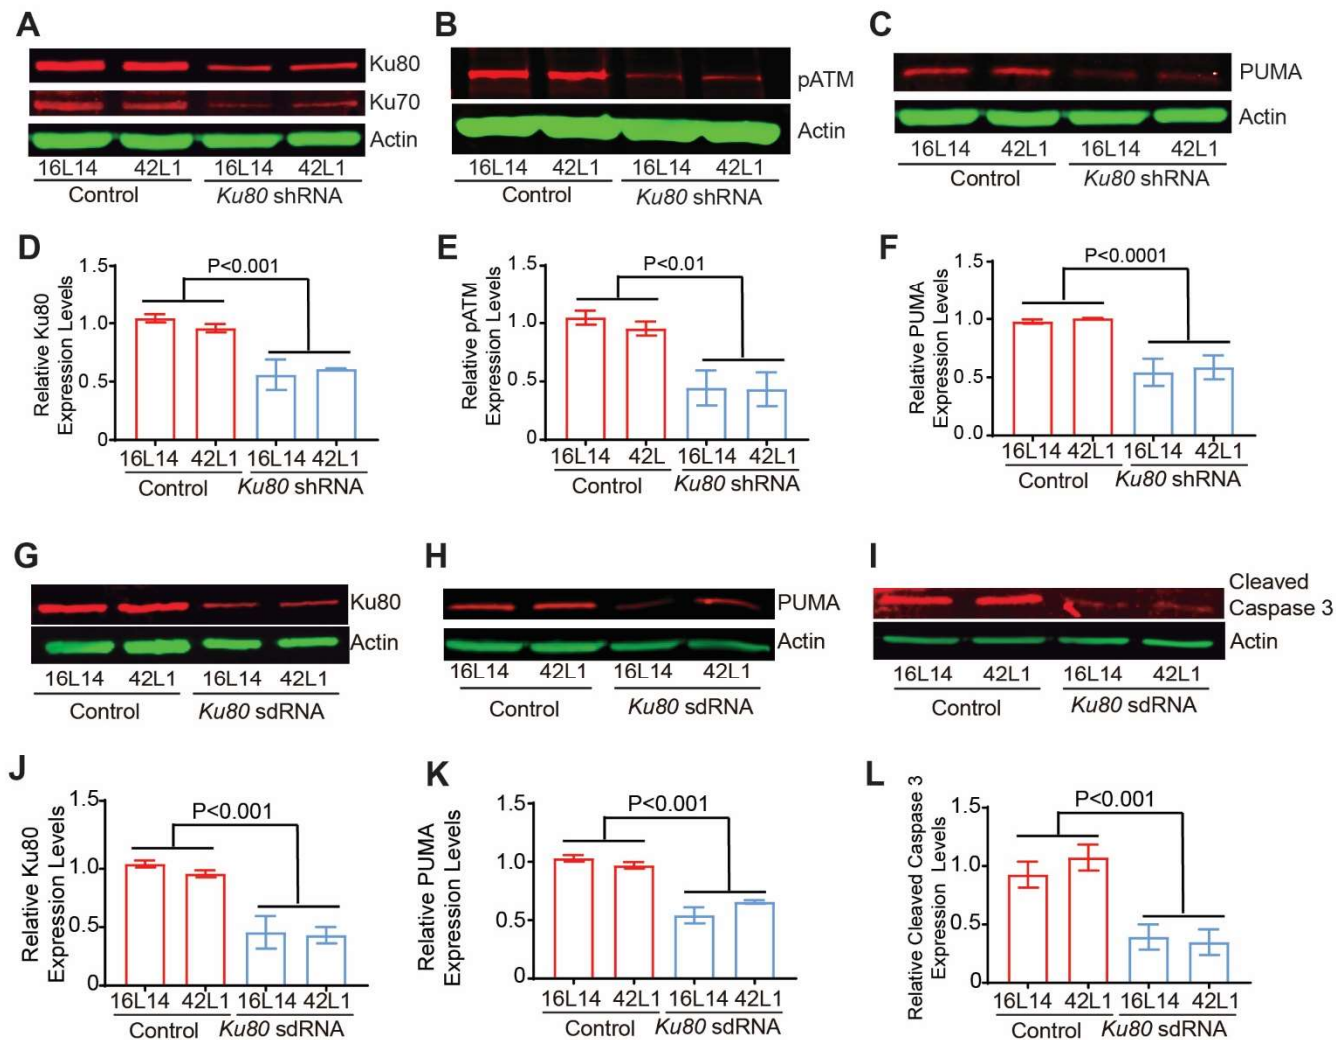

**Fig S9.** Knockdown of *Ku80* mediated by small RNA rescues neurodegeneration in *C9ORF72*-ALS/FTD. (A–C) Western blot analysis of the relative levels of several proteins before and after sdRNA-mediated *Ku80* knockdown in neurons derived from two *C9ORF72* iPSC lines. (D–F) Quantification of western blot analysis from panels A–C. (G–I) Western blot analysis of the relative levels of several proteins before and after sdRNA-mediated *Ku80* knockdown in neurons derived from two *C9ORF72* iPSC lines. (J–L) Quantification of western blot analysis from panels G–I. For all quantifications, values are mean  $\pm$  SEM of 2 independent differentiation experiments. Two-tailed Student's t test was used to compare two *C9ORF72* iPSC lines-derived neurons treated with control or *Ku80*-specific small RNAs.

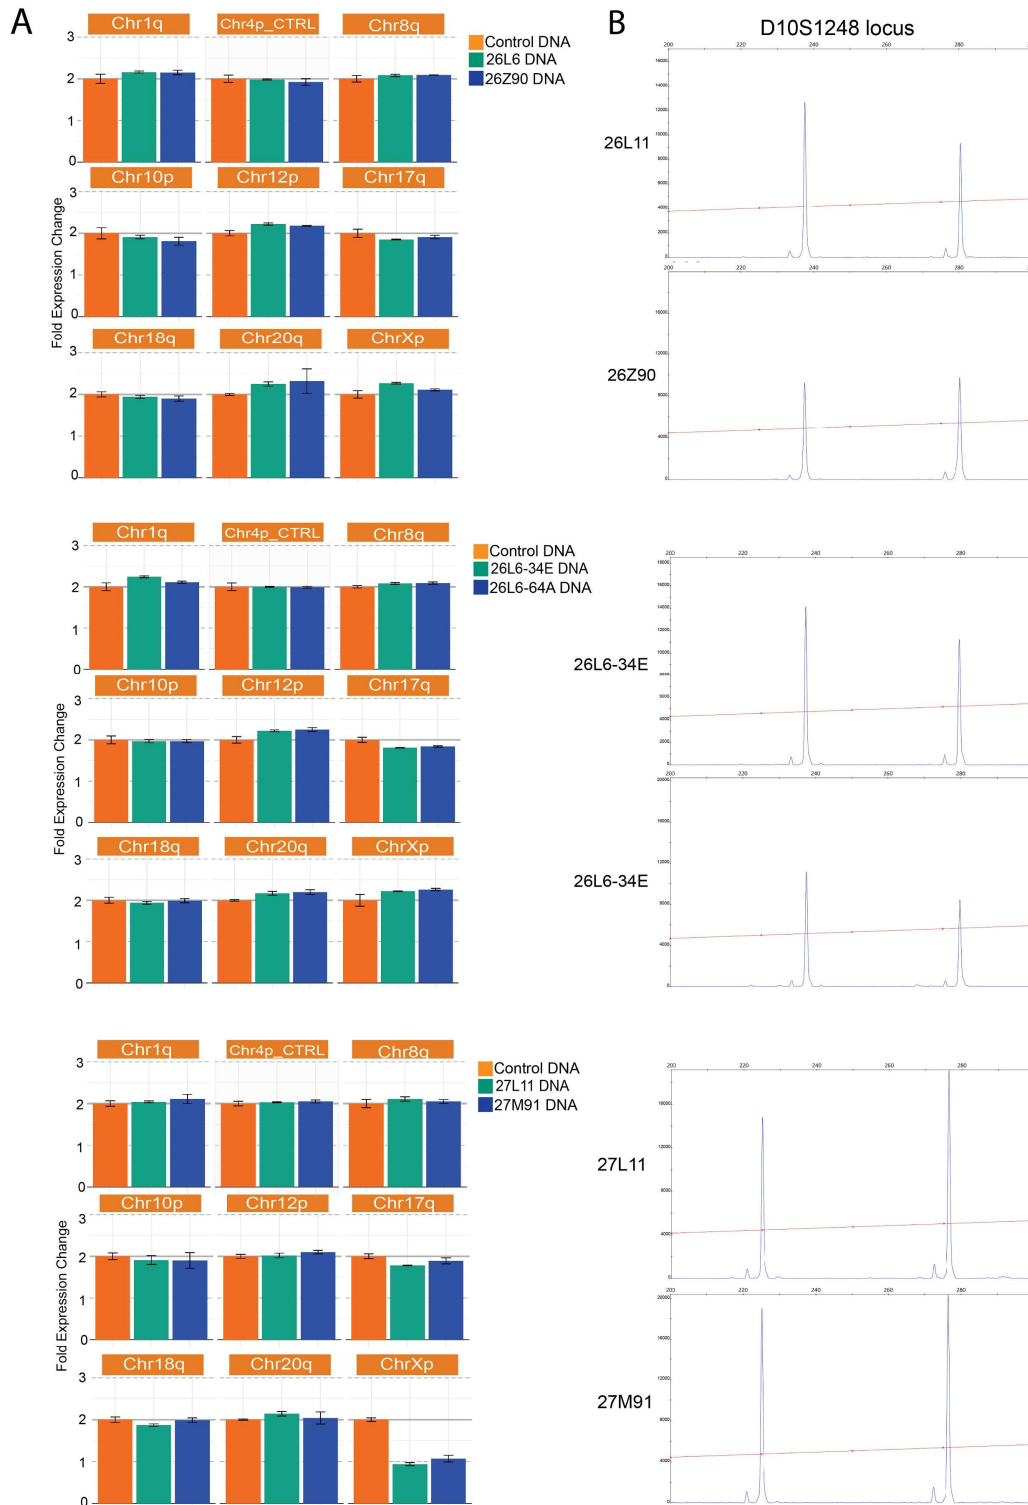

**Fig S10.** Genetic characterization and short tandem repeat analysis of CRISPR isogenic iPSCs lines. (A) qPCR based genetic analysis does not detect genetic abnormalities in iPSC lines 26L6, 26z90, 26L6-34E, 26L6-64A, 27L11 and 27m91. (B) Electropherogram showing the peaks of D10S1248 locus in lines listed above.



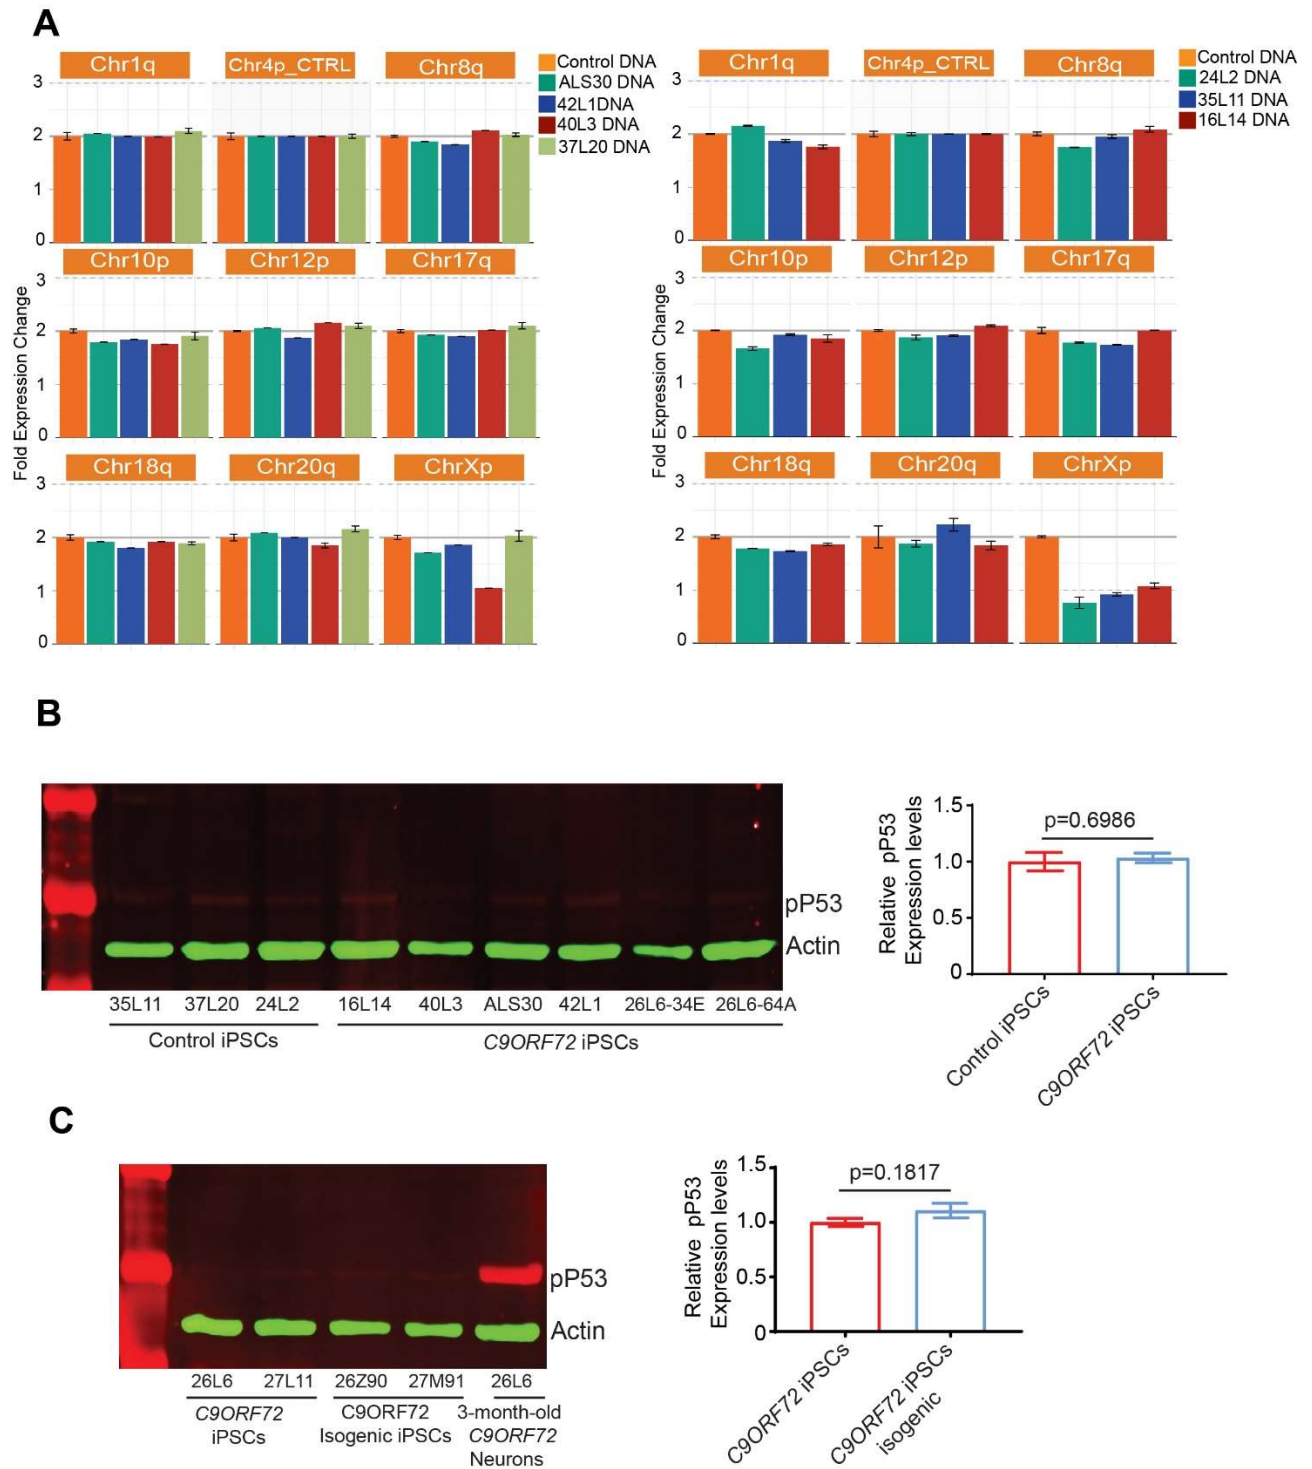

**Fig S11.** Further characterization of iPSC lines used in this study. (A) qPCR based genetic analysis did not detect genetic abnormalities in other iPSC lines used in this study. (B, C) phosphorylated P53 level is not elevated in any of iPSC lines used in this study. values are mean  $\pm$  SEM. Two-tailed Student's t test was used for statistical analysis.

**A**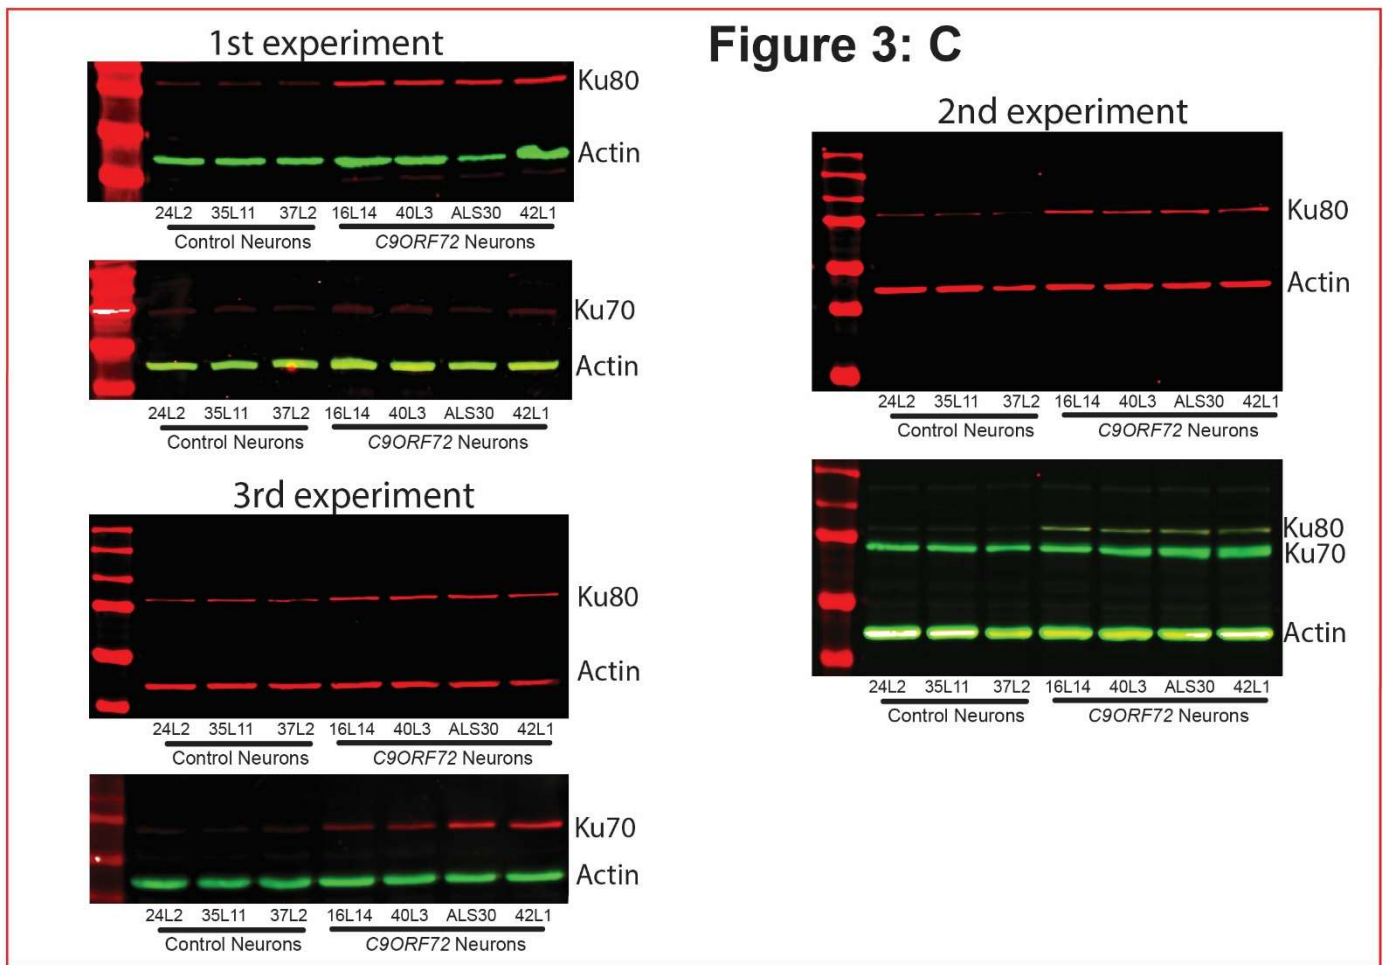**Figure 3: E**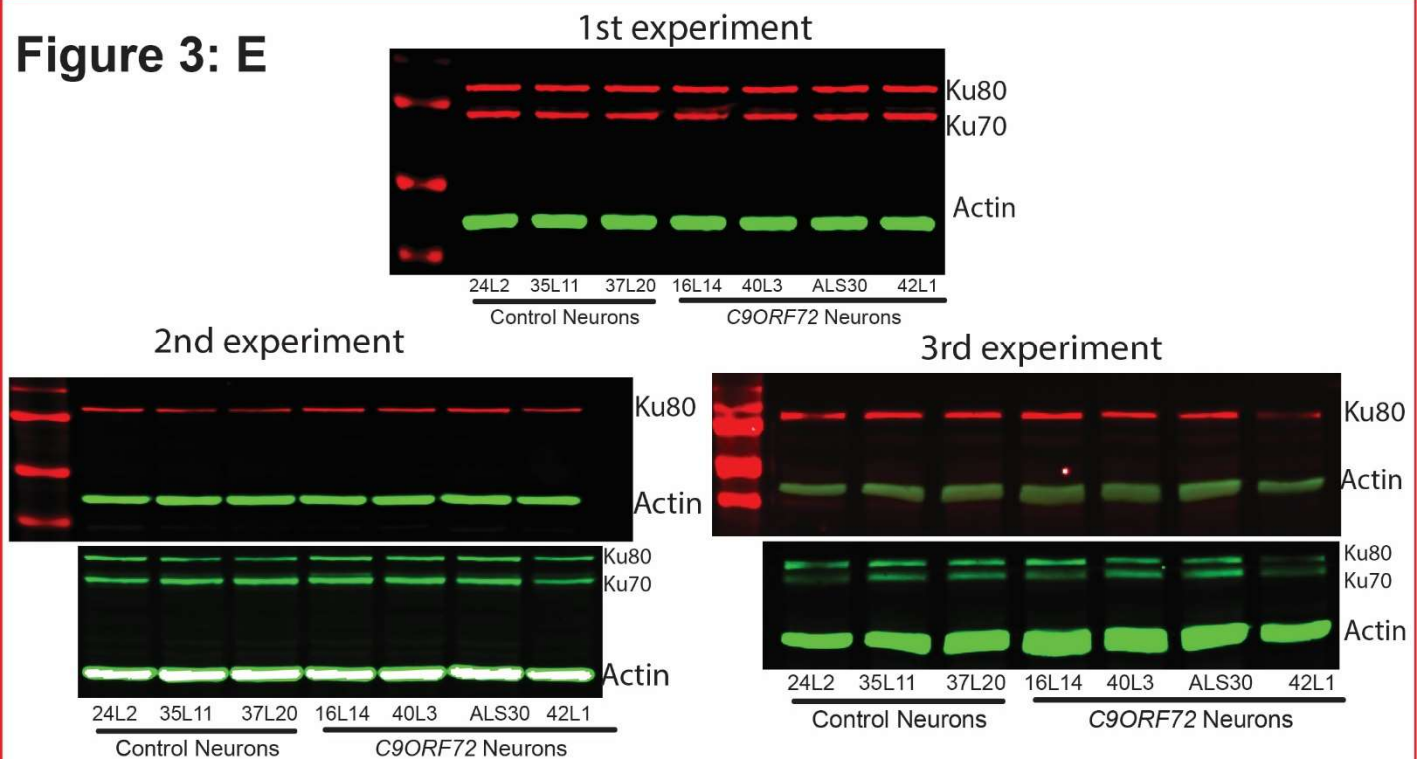



**B****Figure 4: A**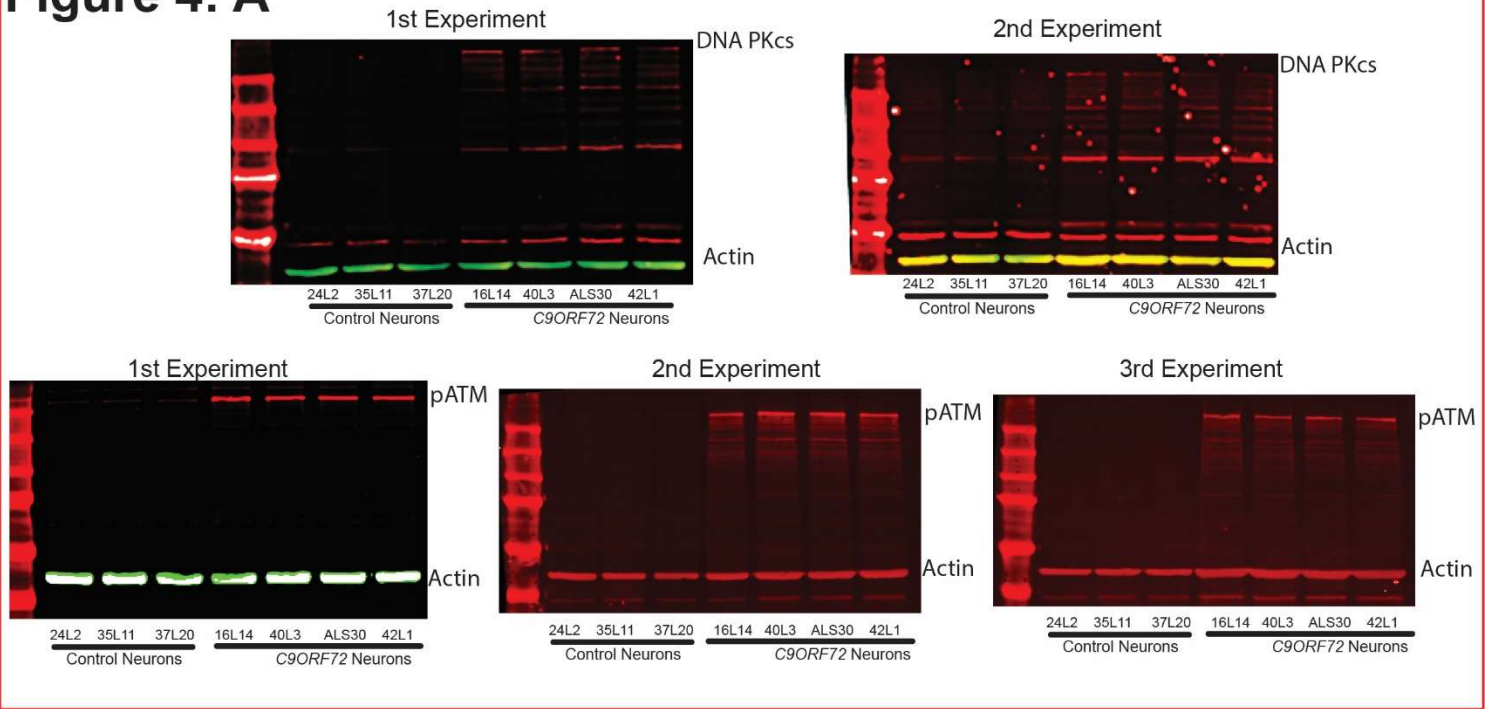**Figure 4: E**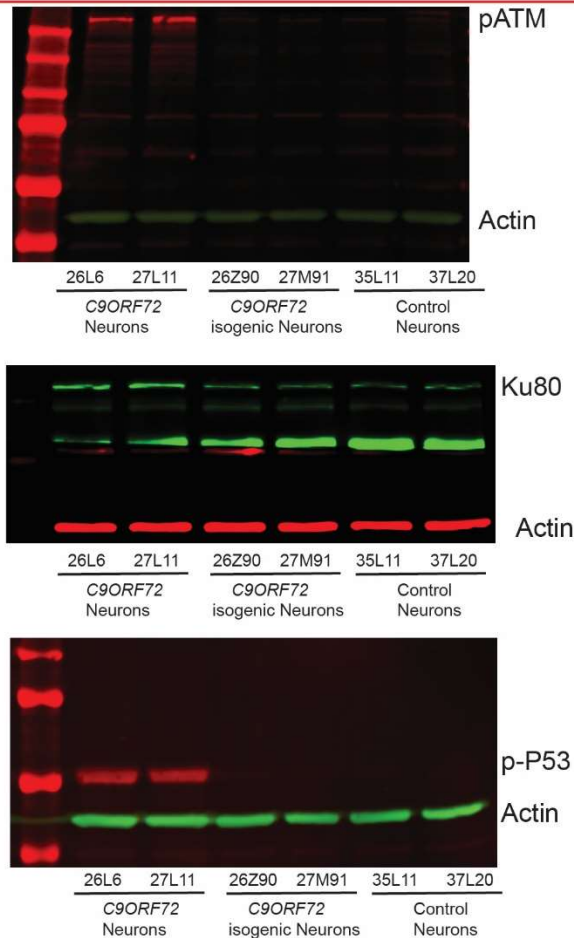

C

Figure 5: A

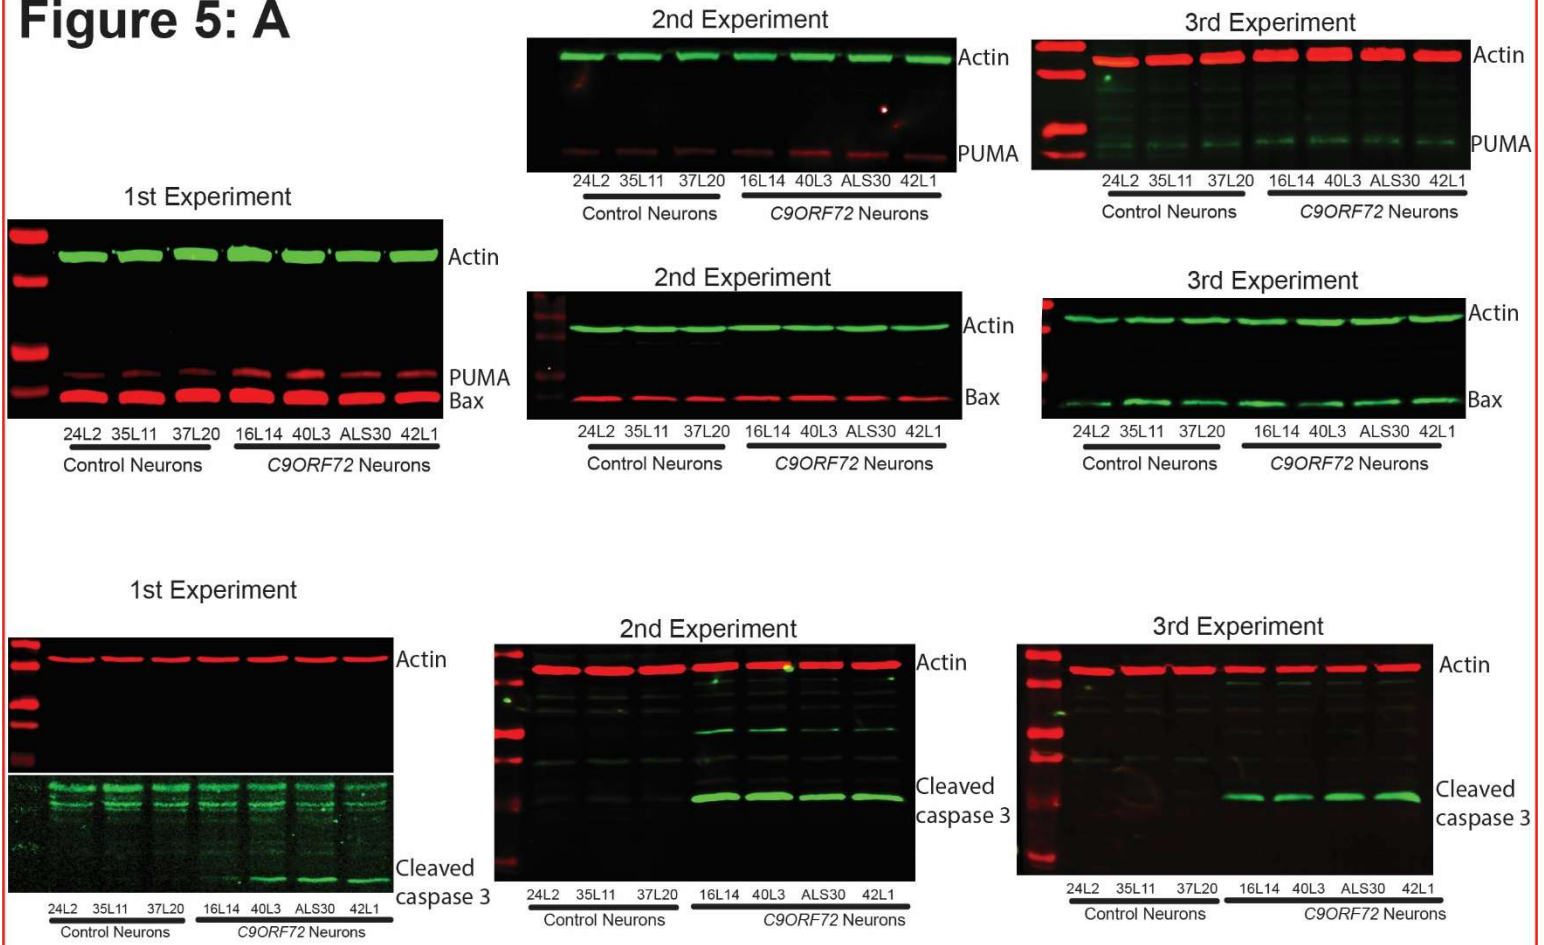

**D****Figure 6: F-H**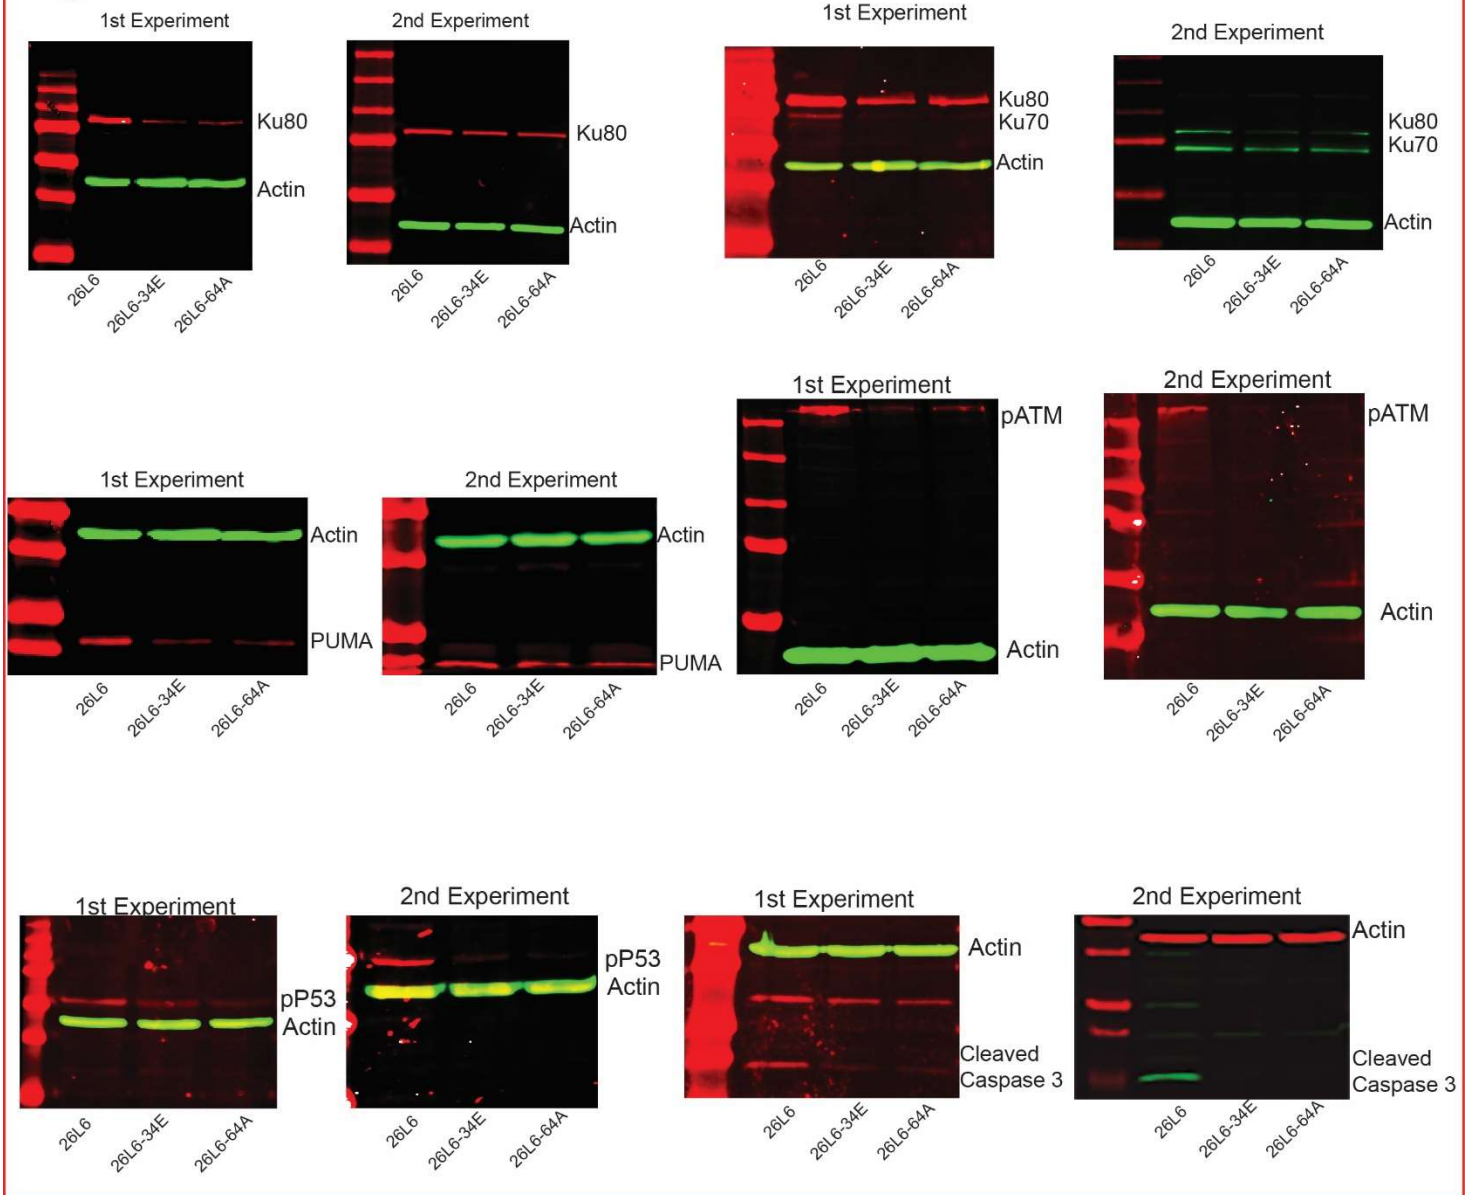

**E****Figure S9: A-C**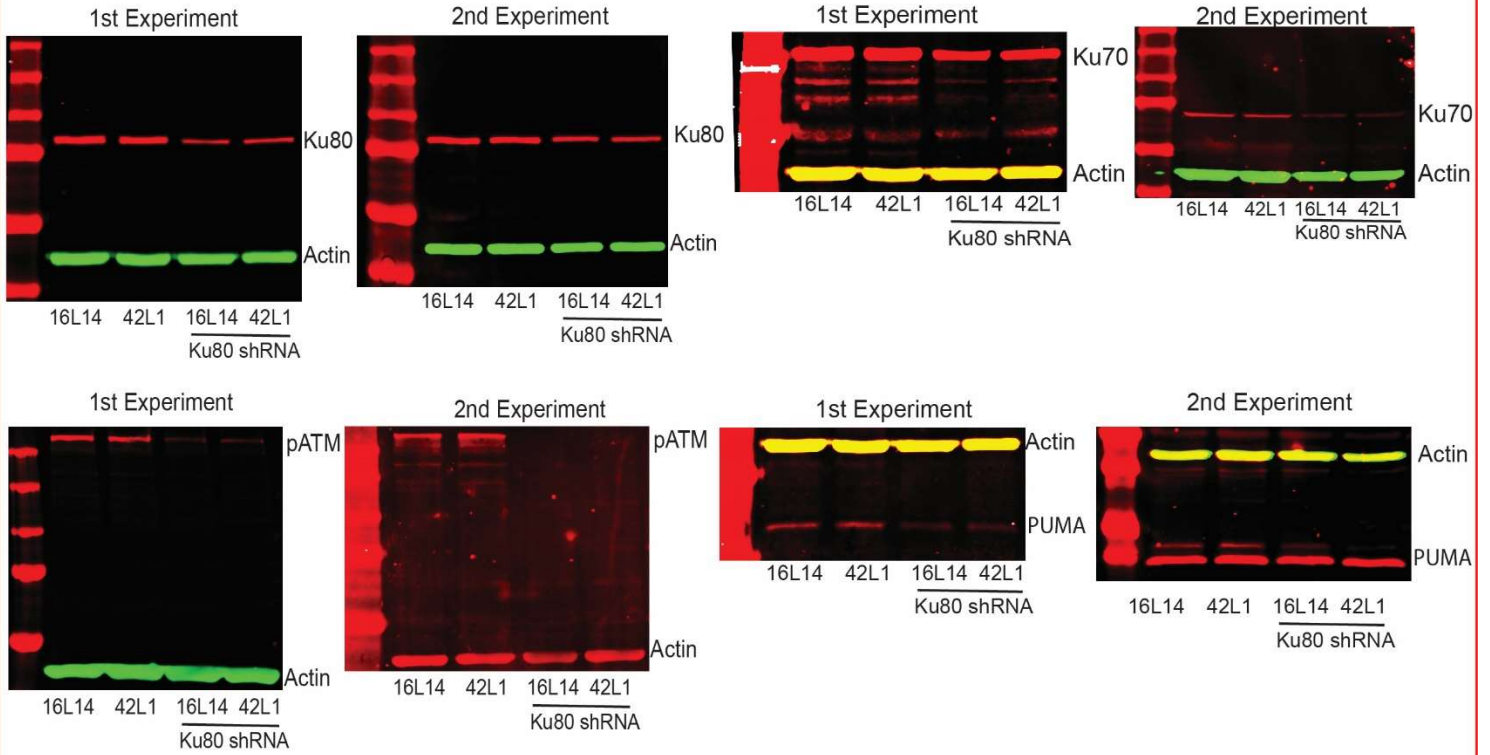**Figure S9: J-K**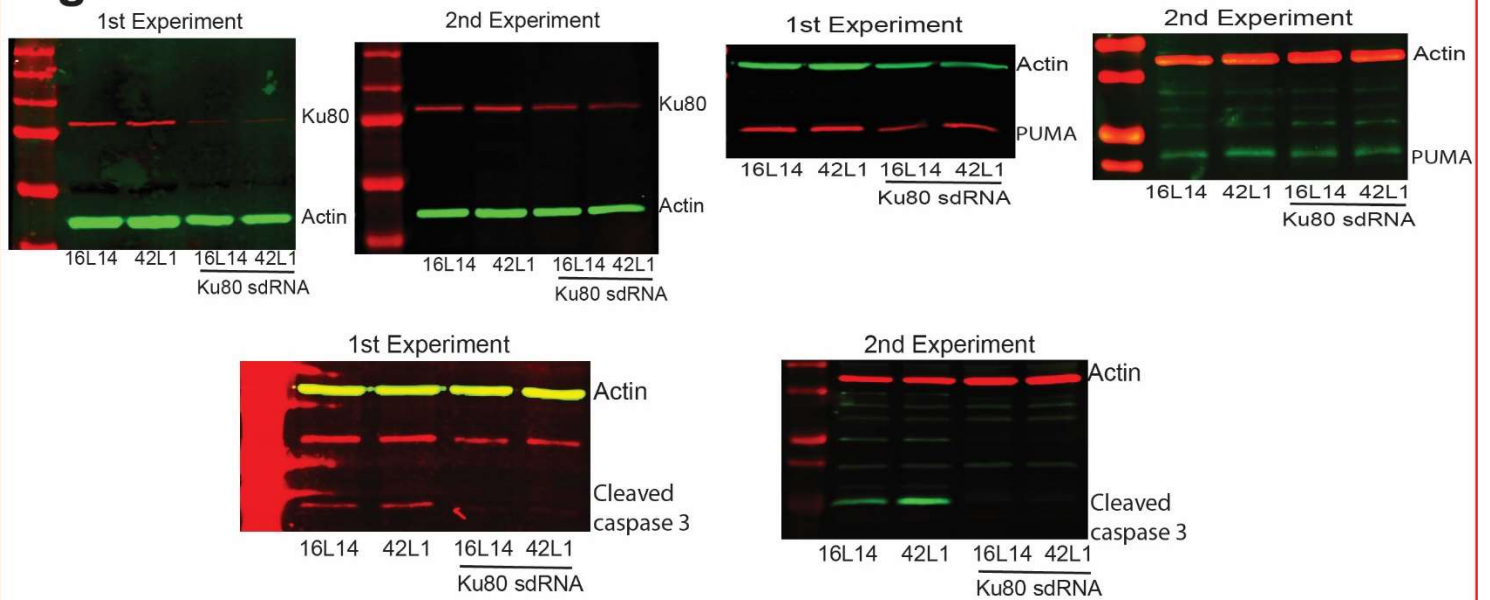**FigS12.** Immunoblot data from: (A) figure 3, (B) figure 4, (C) figure 5, (D) figure 6 and (E) figure S9.

**Table S1.** Deficiency(*Df*) modifiers from the primary screen

| BL Stock # | Deficiency Name       | Locus Deleted            | Phenotype  |
|------------|-----------------------|--------------------------|------------|
| 90         | <i>Df(2L)C144</i>     | 22F4--23C3               | Suppressor |
| 744        | <i>Df(2L)M24F-B</i>   | 24E1--25A2               | Suppressor |
| 4959       | <i>Df(2L)C'</i>       | h35--40A1                | Suppressor |
| 4961       | <i>Df(2R)Kr10</i>     | 60E10--60F5              | Suppressor |
| 5330       | <i>Df(2L)ed1</i>      | 24A2--24D4               | Suppressor |
| 6338       | <i>Df(2L)BSC6</i>     | 26D3--26F7               | Suppressor |
| 6507       | <i>Df(2L)drm-P2</i>   | 23F3--24A2               | Suppressor |
| 7548       | <i>Df(2R)Exel6066</i> | 53F8--54B6               | Suppressor |
| 8045       | <i>Df(2R)ED1612</i>   | 42A13--42E6              | Suppressor |
| 8904       | <i>Df(2L)ED4651</i>   | 23B8--23F3               | Suppressor |
| 8906       | <i>Df(2L)ED678</i>    | 29F5--30B12              | Suppressor |
| 8908       | <i>Df(2L)ED94</i>     | 21E2--21E3               | Suppressor |
| 8918       | <i>Df(2R)ED3683</i>   | 55C2--56C4               | Suppressor |
| 9266       | <i>Df(2L)ED1473</i>   | 39B4--40A5               | Suppressor |
| 9610       | <i>Df(2L)BSC180</i>   | 23B7--23C3               | Suppressor |
| 9615       | <i>Df(2L)BSC188</i>   | 26F1--27A2               | Suppressor |
| 24626      | <i>Df(2L)ED50001</i>  | 21A1--21B1               | Suppressor |
| 24652      | <i>Df(2L)ED441</i>    | 27A1--27E1               | Suppressor |
| 25430      | <i>Df(2R)BSC597</i>   | 58A2--58F1               | Suppressor |
| 26542      | <i>Df(2L)BSC690</i>   | 35D4--35D4               | Suppressor |
| 282        | <i>Df(2R)X58-12</i>   | 58D1--59A1               | Lethal     |
| 7494       | <i>Df(2L)Exel6008</i> | 22F4--23A3               | Lethal     |
| 7783       | <i>Df(2L)Exel7011</i> | 22E1--22F3               | Lethal     |
| 741        | <i>Df(2R)M41A10</i>   | h38R--h46                | Enhancer   |
| 1072       | <i>Df(2R)X1</i>       | 46C2;47A1                | Enhancer   |
| 1469       | <i>Df(2L)J39</i>      | 31C--32E5                | Enhancer   |
| 6478       | <i>Df(2L)BSC17</i>    | 30C3--30F1               | Enhancer   |
| 8469       | <i>Df(2L)BSC50</i>    | 30F5--31B1               | Enhancer   |
| 23691      | <i>Df(2R)BSC308</i>   | 52B5--52D15              | Enhancer   |
| 24335      | <i>Df(2R)BSC267</i>   | 44A4--44F1<br>44A4--44C4 | Enhancer   |
| 24933      | <i>Df(2R)BSC429</i>   | 51C2--51D1               | Enhancer   |
| 25428      | <i>Df(2R)BSC595</i>   | 47A3--47F1               | Enhancer   |
| 25705      | <i>Df(2R)BSC630</i>   | 41D3--41F11              | Enhancer   |
| 25741      | <i>Df(2R)BSC651</i>   | 51C5--51E2               | Enhancer   |
| 26782      | <i>Df(2L)It109</i>    | 40F7--H36                | Enhancer   |
| 27582      | <i>Df(2R)BSC821</i>   | 57D10--57E6              | Enhancer   |
| 29988      | <i>Df(2R)BSC865</i>   | 59A4--59B7               | Enhancer   |
| 30590      | <i>Df(2R)BSC885</i>   | 57D2--57D10              | Enhancer   |



**Table S2. *Drosophila* lines used in this study**

| <b><i>Drosophila</i> lines</b>                                  | <b>Souces</b>                                  |
|-----------------------------------------------------------------|------------------------------------------------|
| <i>w</i> <sup>[1118]</sup>                                      | Yang et al., 2015                              |
| UAS-GFP                                                         | Yang et al., 2015                              |
| UAS-(GR) <sub>80</sub>                                          | Yang et al., 2015                              |
| UAS-(GR) <sub>80</sub> -Control                                 | Yang et al., 2015                              |
| Vg-Gal4/Cyo; UAS-(GR)80/TM6B                                    | Yang et al., 2015                              |
| GMR-Gal4                                                        | BDSC(#9146)                                    |
| Tub-Gal80 <sup>ts</sup>                                         | BDSC(#7019)                                    |
| GMR-Gal4, Gal80 <sup>ts</sup> , UAS-(GR) <sub>80</sub>          | Generated for this work                        |
| GMR-Gal4, Gal80 <sup>ts</sup> ; UAS-(GR) <sub>80</sub> -Control | Generated for this work                        |
| Dificiency Kit for 2nd Chromosome                               | BDSC(Identified locus were listed in figureS1) |

| <b>Target genes</b> | <b>Short name in figures</b> | <b>Souces</b> | <b>Identifier</b> | <b>Stock List Description</b>                                                                                               |
|---------------------|------------------------------|---------------|-------------------|-----------------------------------------------------------------------------------------------------------------------------|
| <i>nAchRalpha6</i>  |                              | BDSC          | BL9686            | <i>nAchRalpha6</i> [DAS2]                                                                                                   |
| <i>nAchRalpha6</i>  |                              | BDSC          | BL25835           | <i>y</i> [1] <i>v</i> [1]; <i>P</i> { <i>y</i> [+7.7] <i>v</i> [+1.8]}=TRiP.JF01853}attP2                                   |
| <i>Bka</i>          |                              | BDSC          | BL31629           | <i>y</i> [1] <i>v</i> [1]; <i>P</i> { <i>y</i> [+7.7] <i>v</i> [+1.8]}=TRiP.JF01415}attP2                                   |
| <i>CG12769</i>      |                              | BDSC          | BL26769           | <i>y</i> [1] <i>v</i> [1]; <i>P</i> { <i>y</i> [+7.7] <i>v</i> [+1.8]}=TRiP.JF02333}attP2                                   |
| <i>CG12769</i>      |                              | BDSC          | BL13261           | <i>y</i> [1] <i>w</i> [67c23]; <i>P</i> { <i>y</i> [+mDint2] <i>w</i> [BR.E.BR]=SUPor-P}CG12769[KG03851]                    |
| <i>Dbr</i>          |                              | BDSC          | BL59280           | <i>y</i> [1] <i>w</i> [*]; <i>Mi</i> { <i>y</i> [+mDint2]=MIC}dbr[M113343]                                                  |
| <i>Dbr</i>          |                              | BDSC          | BL43222           | <i>y</i> [1] <i>sc</i> [*] <i>v</i> [1]; <i>P</i> { <i>y</i> [+7.7] <i>v</i> [+1.8]}=TRiP.GL01567}attP40                    |
| <i>Ercc1</i>        | RNAi-1                       | BDSC          | BL36906           | <i>y</i> [1] <i>sc</i> [*] <i>v</i> [1]; <i>P</i> { <i>y</i> [+7.7] <i>v</i> [+1.8]}=TRiP.GL01110}attP2                     |
| <i>Ercc1</i>        | RNAi-2                       | VDRRC         | V12622            | <i>w</i> [1118]; <i>P</i> {GD4103}v12622                                                                                    |
| <i>FKBP59</i>       |                              | BDSC          | BL28349           | <i>y</i> [1] <i>v</i> [1]; <i>P</i> { <i>y</i> [+7.7] <i>v</i> [+1.8]}=TRiP.JF02985}attP2                                   |
| <i>FKBP59</i>       |                              | BDSC          | BL35612           | <i>y</i> [1] <i>sc</i> [*] <i>v</i> [1]; <i>P</i> { <i>y</i> [+7.7] <i>v</i> [+1.8]}=TRiP.GL00453}attP2                     |
| <i>Ku80</i>         | RNAi-1                       | BDSC          | BL27710           | <i>y</i> [1] <i>v</i> [1]; <i>P</i> { <i>y</i> [+7.7] <i>v</i> [+1.8]}=TRiP.JF02790}attP2                                   |
| <i>Ku80</i>         | RNAi-2                       | VDRRC         | V37110            | <i>w</i> [1118]; <i>P</i> {GD1712}v37110                                                                                    |
| <i>L(2)gl</i>       | RNAi-1                       | BDSC          | BL31089           | <i>y</i> [1] <i>v</i> [1]; <i>P</i> { <i>y</i> [+7.7] <i>v</i> [+1.8]}=TRiP.JF01553}attP2                                   |
| <i>L(2)gl</i>       | RNAi-2                       | BDSC          | BL31517           | <i>y</i> [1] <i>v</i> [1]; <i>P</i> { <i>y</i> [+7.7] <i>v</i> [+1.8]}=TRiP.JF01073}attP2                                   |
| <i>Lig</i>          |                              | BDSC          | BL18242           | <i>w</i> [1118]; <i>P</i> Bac{ <i>w</i> [+mC]=RB}lig[e04268]/CyO                                                            |
| <i>Lig</i>          |                              | BDSC          | BL14943           | <i>y</i> [1]; <i>P</i> { <i>y</i> [+mDint2] <i>w</i> [BR.E.BR]=SUPor-P}lig[KG08209]/CyO; <i>ry</i> [506]                    |
| <i>Lig</i>          |                              | BDSC          | BL61857           | <i>y</i> [1] <i>v</i> [1]; <i>P</i> { <i>y</i> [+7.7] <i>v</i> [+1.8]}=TRiP.HMJ23346}attP40                                 |
| <i>Lilli</i>        |                              | BDSC          | BL5726            | <i>lilli</i> [A17-2] <i>cn</i> [1] <i>bw</i> [1]/CyO                                                                        |
| <i>Lilli</i>        |                              | VDRRC         | V106142           | <i>P</i> {KK102916}VIE-260B                                                                                                 |
| <i>Odd</i>          |                              | BDSC          | BL28295           | <i>y</i> [1] <i>v</i> [1]; <i>P</i> { <i>y</i> [+7.7] <i>v</i> [+1.8]}=TRiP.JF02925}attP2                                   |
| <i>Odd</i>          |                              | BDSC          | BL34328           | <i>y</i> [1] <i>sc</i> [*] <i>v</i> [1]; <i>P</i> { <i>y</i> [+7.7] <i>v</i> [+1.8]}=TRiP.HMS01315}attP2/TM3, <i>Sb</i> [1] |
| <i>Rbp9</i>         |                              | BDSC          | BL25775           | <i>w</i> [*]; <i>Rbp9</i> [Delta1]/CyO                                                                                      |
| <i>Rbp9</i>         |                              | BDSC          | BL28669           | <i>y</i> [1] <i>v</i> [1]; <i>P</i> { <i>y</i> [+7.7] <i>v</i> [+1.8]}=TRiP.JF03084}attP2                                   |
| <i>Rrp1</i>         | Mut-1                        | BDSC          | BL10213           | <i>w</i> [1118]; <i>P</i> Bac{ <i>w</i> [+mC]=PB}Rrp1[c00695]/CyO                                                           |
| <i>Rrp1</i>         | RNAi-1                       | BDSC          | BL35420           | <i>y</i> [1] <i>sc</i> [*] <i>v</i> [1]; <i>P</i> { <i>y</i> [+7.7] <i>v</i> [+1.8]}=TRiP.GL00343}attP2                     |
| <i>Sand</i>         | Mut-1                        | BDSC          | BL17895           | <i>w</i> [1118]; <i>P</i> Bac{ <i>w</i> [+mC]=RB}sand[e00867]                                                               |
| <i>Sand</i>         | RNAi-1                       | BDSC          | BL25853           | <i>y</i> [1] <i>v</i> [1]; <i>P</i> { <i>y</i> [+7.7] <i>v</i> [+1.8]}=TRiP.JF01874}attP2                                   |
| <i>Sec5</i>         |                              | BDSC          | BL27526           | <i>y</i> [1] <i>v</i> [1]; <i>P</i> { <i>y</i> [+7.7] <i>v</i> [+1.8]}=TRiP.JF02676}attP2                                   |
| <i>Sec5</i>         |                              | BDSC          | BL50556           | <i>y</i> [1] <i>v</i> [1]; <i>P</i> { <i>y</i> [+7.7] <i>v</i> [+1.8]}=TRiP.GLC01676}attP2                                  |
| <i>Snx1</i>         |                              | BDSC          | BL29177           | <i>w</i> [1118]; <i>Mi</i> {ET1}Snx1[MB11025]                                                                               |
| <i>Snx1</i>         |                              | BDSC          | BL38301           | <i>y</i> [1] <i>sc</i> [*] <i>v</i> [1]; <i>P</i> { <i>y</i> [+7.7] <i>v</i> [+1.8]}=TRiP.HMS01763}attP40                   |
| <i>Srp54</i>        |                              | BDSC          | BL30533           | <i>y</i> [1] <i>sc</i> [*] <i>v</i> [1]; <i>P</i> { <i>y</i> [+7.7] <i>v</i> [+1.8]}=TRiP.HM05224}attP2                     |
| <i>Srp54</i>        |                              | BDSC          | BL55254           | <i>y</i> [1] <i>sc</i> [*] <i>v</i> [1]; <i>P</i> { <i>y</i> [+7.7] <i>v</i> [+1.8]}=TRiP.HMC03941}attP40                   |
| <i>Wek</i>          |                              | BDSC          | BL30471           | <i>b</i> [1] <i>w</i> ek[RAR14] <i>pr</i> [1] <i>cn</i> [1] <i>bw</i> [1]/CyO                                               |
| <i>Wek</i>          |                              | BDSC          | BL35680           | <i>y</i> [1] <i>sc</i> [*] <i>v</i> [1]; <i>P</i> { <i>y</i> [+7.7] <i>v</i> [+1.8]}=TRiP.GLV21045}attP2                    |
| <i>βggt-II</i>      | RNAi-1                       | BDSC          | BL50516           | <i>y</i> [1] <i>v</i> [1]; <i>P</i> { <i>y</i> [+7.7] <i>v</i> [+1.8]}=TRiP.GLC01634}attP40                                 |
| <i>βggt-II</i>      | RNAi-2                       | BDSC          | BL34902           | <i>y</i> [1] <i>sc</i> [*] <i>v</i> [1]; <i>P</i> { <i>y</i> [+7.7] <i>v</i> [+1.8]}=TRiP.HMS01247}attP2                    |
| <i>Tefu(dATM)</i>   | Mut-1                        | BDSC          | BL29888           | <i>w</i> [1118]; <i>Mi</i> {ET1}tefu[MB09945]/TM6C, <i>Sb</i> [1]                                                           |
| <i>Tefu(dATM)</i>   | Mut-2                        | BDSC          | BL8626            | <i>w</i> [*]; <i>P</i> { <i>ry</i> [+7.2]=neoFRT}82B <i>tefu</i> [atm-6] <i>e</i> [1]/TM6B, <i>Tb</i> [1]                   |
| <i>Tefu(dATM)</i>   | RNAi-1                       | BDSC          | BL31635           | <i>y</i> [1] <i>v</i> [1]; <i>P</i> { <i>y</i> [+7.7] <i>v</i> [+1.8]}=TRiP.JF01422}attP2                                   |

**Bloomington *Drosophila* Stock Center (BDSC)**

**Vienna *Drosophila* Resource Center (VDRRC)**

**Table S3. List of primers and oligonucleotides used in this study.**

| <b>Primer<br/>qPCR</b>                       | <b>Sequence</b>                |
|----------------------------------------------|--------------------------------|
| <i>Ku80</i> forward                          | CCCCAATTCAGCAGCATATT           |
| <i>Ku80</i> -reverse                         | CCTTCAGCCA GACTGGAGAC          |
| PUMA-forward                                 | GCCCAGACTGTGAATCCTGT           |
| PUMA-reverse                                 | TCCTCC CTCTCCGAGATTT           |
| BAX-forward                                  | TTTGCTTCAGGGTTTCATCC           |
| BAX-reverse                                  | CAGTT GAAGTTGCCGTCAGA          |
| GAPDH-forward                                | CTGAACGGCTGTGATGGGAT           |
| GAPDH-reverse                                | GGCATGGACTGTGGTTCATGAG         |
| <i>Drosophila Ku80</i> -forward              | CCTTGTTACCTCCTGGTGCAT          |
| <i>Drosophila Ku80</i> -reverse              | GGGCAGTAGCACAACCATTT           |
| <b>Primer to verify CRISPR/Cas9 deletion</b> |                                |
| <i>Ku80</i> forward                          | GAGGTCTGGTTGTCCTGCTC           |
| <i>Ku80</i> -reverse                         | TGCCTCCCAACCTCTCAGTA           |
| <b>gRNA for C9ORF72 CRISPR/Cas9</b>          |                                |
| Upstream target oligonucleotides             | 5'-CACCGAACTCAGGAGTCGCGCGCT-3' |
|                                              | 5'-AAACAGCGCGCGACTCCTGAGTTC-3' |
| Downstream target oligonucleotides           | 5'-CACCGCGGGGCGGGGCTGCGGTTG-3' |
|                                              | 5'-AAACCAACCGCAGCCCCGCCCCGC3'. |
| <b>gRNA for ku80 CRISPR/Cas9</b>             |                                |
| Upstream target oligonucleotides             | 5'-TACTGATCCCCACCAGAAAG-3'     |
| Downstream target oligonucleotides           | 5'-AATCCAACCAGGTTCTCAAC-3'     |

**Table S4. Summary of Quality control assays for *C9ORF72* iPSCs lines edited by the CRISPR/Cas9 technology.**

| <b>iPSC line name</b> | <b>Gene edited</b>                    | <b>Modification</b> | <b>Karyotyping test</b>  | <b>Pluripotency markers</b>       | <b>STR</b>                         | <b>qPCR based Genetic analysis of chromosomes:</b> |
|-----------------------|---------------------------------------|---------------------|--------------------------|-----------------------------------|------------------------------------|----------------------------------------------------|
| 26L6-34E              | <i>Ku80</i>                           | Deletion            | G banding at passage 12* | -qPCR analysis<br>-Immunostaining | Fusion 6C™, locus multiplex system | 1q, 4p, 8q, 10p, 12p, 17q, 18q, 20q and Xp         |
| 26L6-64A              | <i>Ku80</i>                           | Deletion            | G banding at passage 12* | -qPCR analysis<br>-Immunostaining | Fusion 6C™, locus multiplex system | 1q, 4p, 8q, 10p, 12p, 17q, 18q, 20q and Xp         |
| 26Z90                 | G <sub>4</sub> C <sub>2</sub> repeats | Deletion            | G banding at Passage 39  | -qPCR analysis<br>-Immunostaining | Fusion 6C™, locus multiplex system | 1q, 4p, 8q, 10p, 12p, 17q, 18q, 20q and Xp         |
| 27M91                 | G <sub>4</sub> C <sub>2</sub> repeats | Deletion            | G banding at Passage 48  | -qPCR analysis<br>-Immunostaining | Fusion 6C™, locus multiplex system | 1q, 4p, 8q, 10p, 12p, 17q, 18q, 20q and Xp         |

**Abbreviations:**

qPCR: quantitative polymerase chain reaction, STR: Short tandem repeat analysis

**Note:**

\*: the passage number is after CRISPR/Cas9 deletion was made.



**Table S5. Summary of iPSCs lines used in this study**

| iPSC line name | Source           | Clinical Diagnosis | Karyotyping test                      | Pluripotency Markers tests | <i>In vitro</i> 3 germ layers differentiation | qPCR based Genetic analysis of chromosomes: |
|----------------|------------------|--------------------|---------------------------------------|----------------------------|-----------------------------------------------|---------------------------------------------|
| Control        |                  |                    |                                       |                            |                                               |                                             |
| 24L2           | Skin fibroblasts | Healthy control    | G banding at passage #14              | -qPCR<br>-Immunostaining   | -Endoderm<br>-Mesoderm<br>-Ectoderm           | 1q, 4p, 8q, 10p, 12p, 17q, 18q, 20q and Xp  |
| 35L11          | Skin fibroblasts | Healthy control    | G banding at passage #13              | -qPCR<br>-Immunostaining   | -Endoderm<br>-Mesoderm<br>-Ectoderm           | 1q, 4p, 8q, 10p, 12p, 17q, 18q, 20q and Xp  |
| 37L20          | Skin fibroblasts | Healthy control    | The passage # for the test is unknown | -qPCR<br>-Immunostaining   | -Endoderm<br>-Mesoderm<br>-Ectoderm           | 1q, 4p, 8q, 10p, 12p, 17q, 18q, 20q and Xp  |
| <i>C9ORF72</i> |                  |                    |                                       |                            |                                               |                                             |
| 16L14          | Skin fibroblasts | FTD                | G banding at passage #12              | -qPCR<br>-Immunostaining   | -Endoderm<br>-Mesoderm<br>-Ectoderm           | 1q, 4p, 8q, 10p, 12p, 17q, 18q, 20q and Xp  |
| 40L3           | Skin fibroblasts | FTD/ALS            | G banding at passage #8               | -qPCR<br>-Immunostaining   | -Endoderm<br>-Mesoderm<br>-Ectoderm           | 1q, 4p, 8q, 10p, 12p, 17q, 18q, 20q and Xp  |
| ALS30          | Skin fibroblasts | ALS                | The passage # for the test is unknown | -Immunostaining            | -Endoderm<br>-Mesoderm<br>-Ectoderm           | 1q, 4p, 8q, 10p, 12p, 17q, 18q, 20q and Xp  |
| 42L1           | Skin fibroblasts | Clinical normal    | G banding at passage #14              | -qPCR<br>-Immunostaining   | -Endoderm<br>-Mesoderm<br>-Ectoderm           | 1q, 4p, 8q, 10p, 12p, 17q, 18q, 20q and Xp  |
| 26L6           | Skin fibroblasts | Clinical normal    | G banding at passage #14              | -qPCR<br>-Immunostaining   | -Endoderm<br>-Mesoderm<br>-Ectoderm           | 1q, 4p, 8q, 10p, 12p, 17q, 18q, 20q and Xp  |
| 27L11          | Skin fibroblasts | FTLD-TDP Type B    | G banding at passage #17              | -qPCR<br>-Immunostaining   | -Endoderm<br>-Mesoderm<br>-Ectoderm           | 1q, 4p, 8q, 10p, 12p, 17q, 18q, 20q and Xp  |

**Abbreviations:**

FTD: Frontotemporal dementia

ALS: Amyotrophic lateral sclerosis

FTLD: Frontotemporal lobar degeneration

FTLD-TDP: FTLD with motor neuron disease and TDP-43 immunoreactive inclusions

qPCR: quantitative polymerase chain reaction

**Table S6. List of antibodies used in this study.**

| <b>Antibody</b>                        | <b>Dilution</b> | <b>Vendor</b>                   |
|----------------------------------------|-----------------|---------------------------------|
| rabbit anti-Ku80                       | 1:1000          | Cell Signaling, Cat. no. 2753   |
| mouse anti-Ku70                        | 1:1000          | Cell Signaling, Cat. no. 4104   |
| rabbit anti-phosphorylated ATM         | 1:1000          | Abcam, Cat. no. ab81292         |
| rabbit anti-phosphorylated P53 (Ser15) | 1:1000          | Cell Signaling, Cat. no. 9284   |
| rabbit DNA PKcs                        | 1:1000          | Abcam, Cat. no. ab70250         |
| rabbit anti-cleaved caspase 3          | 1:1000          | Cell Signaling, Cat. no. 9661   |
| rabbit anti-BAX                        | 1:1000          | Abcam, Cat. No. 32503           |
| rabbit anti-PUMA                       | 1:1000          | Proteintech, Cat. no. 55120-1AP |
| mouse anti- $\beta$ -actin             | 1:3000          | Sigma-Aldrich, Cat. no. A2228   |
| mouse anti- $\alpha$ -Tubulin          | 1:2000          | Sigma, Cat. no. T6199           |

## References

1. Lopez-Gonzalez R, *et al.* (2016) Poly(GR) in C9ORF72-related ALS/FTD compromises mitochondrial function and increases oxidative stress and DNA damage in iPSC-derived motor neurons. *Neuron* 92:383–391.
